# Supplementary material
Source: PubMed Central journal article supplement (PMC4766021)
Supplement: NIHMS737767-supplement.pdf [file NIHMS737767-supplement.pdf]

## **Supplementary Information List**

**Supplementary Figure 1. Fold change in protein expression.**

**Supplementary Figure 2. RNA microarray analysis.**

**Supplementary Figure 3. Immunofluorescence staining on mouse liver sections for TLR4, and NANOG.**

**Supplementary Figure 4. Twist1 is required for mesenchymal phenotype, cell proliferation and self-renewal in TICs.**

**Supplementary Figure 5.  *Twist1*  promoter activation in Huh7.**

**Supplementary Figure 6. Induction of TLR4/NANOG/P-STAT3/TWIST1 pathway components in mouse HCCs.**

**Supplementary Figure 7. Immunofluorescence staining of mouse liver sections for TLR4, NANOG, TWIST1, AFP, CD133 and CD49F.**

**Supplementary Figure 8. Immunofluorescence analysis of TLR4 and hepatocyte marker in NS5A Tg and wild type mice.**

**Supplementary Figure 9. Induction of TLR4/NANOG/P-STAT3/TWIST1 pathway components in Human HCC.**

**Supplementary Figure 10. Patient clinical data sets.**

**Supplementary Figure 11.  *Twist1*  by its very nature promotes tumor formation.**

**Supplementary Table 1: Clinicopathological Features of Patients with Hepatocellular Carcinoma**

**Supplementary Table 2. Liver histological grading of HCV NS5A, wild type, Tlr4<sup>-/-</sup> and Tlr4<sup>-/-</sup>-NS5A Tg mice fed the lean-fat diet (LFD), HCFD or HCFD+LPS for 12 months.**

**Supplementary Table 3. Antibody list**

**Supplementary Table 4. qRT-PCR primer sets**

**Supplementary Table 5.  *In vitro*  mutagenesis primer sets**

**Supplementary Table 6. ChIP-qPCR primer sets**

**Supplementary Materials and Methods**

**Supplementary Discussion**

**Supplementary References**

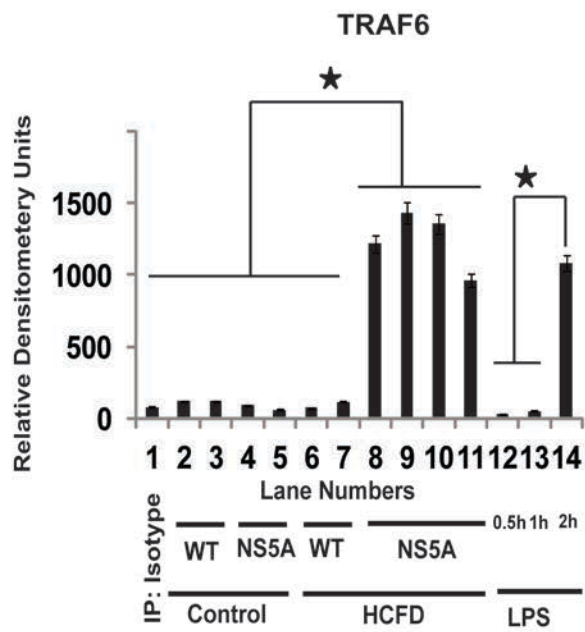

**Supplementary Figure 1. Fold change in Twist1 gene expression in TICs.** Quantification of TRAF6 expression from Figure 1E using Image-J.

Suppl. Figure 1  
 Uthaya Kumar *et al.*

# NS5A+HCFD VS Non-Tg+HCFD Microarray gene expression analysis

| Official Gene Name                                   | Official gene symbol | Fold change in gene expression | Official Gene Name                                          | Official gene symbol | Fold change in gene expression |
|------------------------------------------------------|----------------------|--------------------------------|-------------------------------------------------------------|----------------------|--------------------------------|
| osteomodulin                                         | Omd                  | 188.6                          | ATP/GTP binding protein-like 3                              | Agb3                 | 0.195                          |
| cytochrome P450                                      | family 2             | 58.0                           | DPH5 homolog ( <i>S. cerevisiae</i> )                       | Dph5                 | 0.195                          |
| ubiquitin D                                          | Ubd                  | 47.6                           | lipase                                                      | endothelial          | 0.195                          |
| cell death-inducing DNA fragmentation factor         | alpha subunit        | 45.8                           | ATP-binding cassette                                        | sub-family B         | 0.194                          |
| sulfotransferase family 1E                           | member 1             | 31.7                           | leukemia inhibitory factor receptor                         | Lifr                 | 0.193                          |
| neurotrophic tyrosine kinase                         | receptor             | 27.6                           | bronchodilator containing 4                                 | Brd4                 | 0.193                          |
| lymphocyte antigen 6 complex                         | locus D              | 26.4                           | pancreatic lipase-related protein 2                         | Pnlpp2               | 0.192                          |
| neurotrophic tyrosine kinase                         | receptor             | 25.2                           | RIKEN cDNA 4632419K20 gene                                  | 4632419K20           | 0.190                          |
| aspirin                                              | Aspn                 | 25.1                           | KH domain containing                                        | RNA bindi            | 0.189                          |
| rabphilin 3A                                         | Rph3a                | 20.6                           | sortilin-related VPS10 domain containing receptor 2         | Sorcs2               | 0.189                          |
| Transcribed locus                                    |                      | 19.8                           | UDP-Gal:betaGlcNAc beta 1                                   | 3-galactosyltr       | 0.186                          |
| <b>Nanog</b> homeobox                                | <b>Nanog</b>         | <b>19.2</b>                    | cell cycle exit and neuronal differentiation 1              | Cend1                | 0.185                          |
| small proline-rich protein 1A                        | Sprr1a               | 16.0                           | complement factor H-related 1                               | Chfr1                | 0.184                          |
| chitinase 3-like 3                                   | Chi3l3               | 15.1                           | FBJ osteosarcoma oncogene                                   | Fos                  | 0.184                          |
| camello-like 5                                       | Cml5                 | 14.5                           | transcription factor AP-2 beta                              | Tcfap2b              | 0.182                          |
| G protein-coupled receptor 98                        | Gpr98                | 14.0                           | Metastasis associated lung adenocarcinoma transcript 1      | Malat1               | 0.180                          |
| DnaJ (Hsp40) homolog                                 | subfamily C          | 13.5                           | Microtubule-associated protein 1 light chain 3 beta         | Map1lc3b             | 0.179                          |
| cholecystokinin A receptor                           | Cckar                | 13.4                           | expressed sequence AA414993                                 | AA414993             | 0.179                          |
| fatty acid binding protein 4                         | adipocyte            | 12.9                           | oxysterol binding protein-like 6                            | Osbpl6               | 0.174                          |
| fatty acid binding protein 4                         | adipocyte            | 12.9                           | Hedgehog-interacting protein                                | Hhip                 | 0.173                          |
| lin-28 homolog ( <i>C. elegans</i> )                 | Lin28                | 12.7                           | keratin associated protein 16-1                             | Krtap16-1            | 0.172                          |
| camello-like 4                                       | Cml4                 | 11.9                           | integrin binding sialoprotein                               | lbsp                 | 0.171                          |
| <b>twist gene homolog 1 (<i>Drosophila</i>)</b>      | <b>Twist1</b>        | <b>11.9</b>                    | lipocalin 4                                                 | Lcn4                 | 0.170                          |
| plasma membrane associated protein                   | SP-12                | 11.5                           | B-cell leukemia/lymphoma 2 related protein A1a              | Bcl2a1a              | 0.161                          |
| CEA-related cell adhesion molecule 11                | Ceacam11             | 11.5                           | quiescinq Q6 sulfhydryl oxidase 1                           | Qsox1                | 0.169                          |
| C-type lectin domain family 7                        | member a             | 11.3                           | prokineticin receptor 1                                     | Prokr1               | 0.169                          |
| serine threonine kinase 31                           | Stk31                | 11.3                           | ribosomal protein S19                                       | Rps19                | 0.166                          |
| <b>matrix metalloproteinase 13</b>                   | <b>Mmp13</b>         | <b>11.0</b>                    | coatamer protein complex                                    | subunit gam          | 0.166                          |
| <b>pancreatic lipase-related protein 2</b>           | <b>Pnlpp2</b>        | <b>10.8</b>                    | annexin A2                                                  | Anxa2                | 0.163                          |
| <b>matrix metalloproteinase 16</b>                   | <b>Mmp16</b>         | <b>10.3</b>                    | immunoglobulin kappa chain variable 28 (V28)                | bustructural Ba      | 0.157                          |
| cadherin 4                                           | Cdh4                 | 10.3                           | cholinergic receptor                                        | nicotinic            | 0.157                          |
| killer cell lectin-like receptor subfamily C         | member 3             | 10.2                           | Transcribed locus                                           |                      | 0.157                          |
| prolectin family 3                                   | subfamily c          | 10.1                           | vomeronasal 1 receptor                                      | C8                   | 0.156                          |
| DNA cytosine methyltransferase mRNA                  |                      | 10.0                           | RAD51 associated protein 1                                  | Rad51ap1             | 0.154                          |
| CEA-related cell adhesion molecule 11                | Ceacam11             | 9.8                            | protocadherin beta 14                                       | Pcdhb14              | 0.152                          |
| leucine rich repeat transmembrane neuronal 2         | Lrrtm2               | 9.7                            | myelin-associated oligodendrocytic basic protein            | Molbp                | 0.152                          |
| calcitonin/calcitonin-related polypeptide            | alpha                | 9.6                            | nanos homolog 1 ( <i>Drosophila</i> )                       | Nanos1               | 0.150                          |
| solute carrier family 10                             | member 2             | 9.6                            | integrin alpha 4                                            | Itga4                | 0.147                          |
| Crx opposite strand transcript 1                     | Crxos1               | 9.5                            | solute carrier family 22 (organic anion transporter)        | member 7             | 0.142                          |
| RIKEN cDNA D930048N14 gene                           | D930048N             | 9.4                            | chromatin licensing and DNA replication factor 1            | Cdt1                 | 0.140                          |
| uncoupling protein 1 (mitochondrial)                 | proton carrier       | 9.4                            | Phosphoenolpyruvate carboxykinase 1                         | cytosolic            | 0.139                          |
| mitogen activated protein kinase 10                  | Mapk10               | 9.3                            | hepcidin antimicrobial peptide 1                            | Hamp1                | 0.139                          |
| histocompatibility 2                                 | class II antigen     | 9.3                            | androgen binding protein beta                               | Abpb                 | 0.137                          |
| synovial sarcoma                                     | X breakpoint         | 9.2                            | Phospholipase A2                                            | group IB             | 0.137                          |
| similar to H-2 class I histocompatibility antigen    | D-37 alpha c         | 9.1                            | procollagen                                                 | type V               | 0.136                          |
| chemokine (C-X-C motif) ligand 14                    | Cxcl14               | 8.8                            | recoverin                                                   | Rcvm                 | 0.135                          |
| epithelial membrane protein 1                        | Emp1                 | 8.6                            | cyclin B1                                                   | related sequ         | 0.135                          |
| insulin-like growth factor 2 mRNA binding protein 3  | Igf2bp3              | 8.6                            | doublecortin-like kinase 1                                  | Dclk1                | 0.135                          |
| C-type lectin domain family 4                        | member n             | 8.5                            | inactive X specific transcripts                             | Xist                 | 0.130                          |
| vacuolar protein sorting 11 (yeast)                  | Vps11                | 8.4                            | tetratricopeptide repeat domain 16                          | Ttc16                | 0.129                          |
| matrix metalloproteinase 12                          | Mmp12                | 8.3                            | RIKEN cDNA 1700016D06 gene                                  | 1700016D06           | 0.128                          |
| glycoprotein (transmembrane) nmb                     | Gpnmb                | 8.2                            | T-cell lymphoma invasion and metastasis 2                   | Tiam2                | 0.125                          |
| eosinophil-associated                                | ribonuclease         | 8.2                            | interferon alpha 4                                          | Ifna4                | 0.124                          |
| keratin 14                                           | Krt14                | 8.0                            | defensin beta 10                                            | Defb10               | 0.124                          |
| major urinary protein 3                              | Mup3                 | 7.9                            | inactive X specific transcripts                             | Xist                 | 0.116                          |
| on-SMC condensin I complex                           | subunit G            | 7.9                            | vomeronasal 2                                               | receptor             | 0.115                          |
| <b>serum amyloid A 2</b>                             | <b>Saa2</b>          | <b>7.7</b>                     | Predicted gene                                              | EG629860             | 0.115                          |
| pyruvate dehydrogenase kinase                        | isozyme 4            | 7.6                            | cytochrome P450                                             | family 51            | 0.114                          |
| thyrotropin releasing hormone receptor               | Trhr                 | 7.5                            | tripartite motif protein 16                                 | Trim16               | 0.113                          |
| secreted frizzled-related protein 2                  | Sfrp2                | 7.5                            | leptin receptor                                             | LepR                 | 0.112                          |
| ankyrin repeat domain 22                             | Ankrd22              | 7.3                            | dolichyl-di-phosphooligosaccharide-protein glycotransferase | Ddost                | 0.111                          |
| fatty acid binding protein 7                         | brain                | 7.3                            | fibroblast growth factor 4                                  | Fgf4                 | 0.110                          |
| serine (or cysteine) peptidase inhibitor             | clade B              | 7.3                            | defensin beta 5                                             | Defb5                | 0.103                          |
| neurogenin 1                                         | Neurog1              | 7.3                            | cDNA sequence BC014805                                      | BC014805             | 0.097                          |
| coagulation factor XIII                              | A1 subunit           | 7.2                            | serine/arginine-rich protein specific kinase 3              | Srpk3                | 0.096                          |
| procollagen                                          | type IX              | 7.2                            | olfactory receptor 69                                       | Olf69                | 0.093                          |
| phosphodiesterase 6A                                 | cGMP-speci           | 7.1                            | myosin                                                      | heavy polype         | 0.092                          |
| collec-coil domain containing 120                    | Ccdc120              | 7.1                            | cDNA sequence BC014805                                      | BC014805             | 0.090                          |
| hemoglobin Y                                         | beta-like e          | 7.1                            | paternally expressed 3                                      | Peg3                 | 0.088                          |
| neuropeptide Y receptor Y5                           | Npy5r                | 7.0                            | hydroxy-delta-5-steroid dehydrogenase                       | 3 beta- and s        | 0.088                          |
| folate hydrolase                                     | Folh1                | 6.8                            | oogenesis 1 // similar to Oog1 protein                      | LOC1000390           | 0.087                          |
| RIKEN cDNA 1700029I01 gene                           | OTTMUSG0             | 6.8                            | RIKEN cDNA 1810022C23 gene                                  | 1810022C23           | 0.087                          |
| cytochrome b-245                                     | beta polypep         | 6.8                            | paternally expressed 3                                      | Peg3                 | 0.086                          |
| ATP-binding cassette                                 | sub-family D         | 6.7                            | dopamine receptor 4                                         | Drd4                 | 0.083                          |
| expressed sequence C77370                            | C77370               | 6.7                            | Transcribed locus                                           |                      | 0.082                          |
| phosphatidylinositol-4-phosphate 5-kinase            | type II              | 6.6                            | cytochrome P450                                             | family 51            | 0.081                          |
| ferritin mitochondrial                               | Ftnm                 | 6.6                            | solute carrier family 1                                     | Scf1                 | 0.076                          |
| DBF4 homolog ( <i>S. cerevisiae</i> )                | Dbf4                 | 6.6                            | Hedgehog-interacting protein                                | Hhip                 | 0.075                          |
| cholecystokinin B receptor                           | Cckbr                | 6.5                            | cytochrome P450                                             | family 51            | 0.071                          |
| vacuolar protein sorting 29 ( <i>S. pombe</i> )      | Vps29                | 6.5                            | regenerating islet-derived 3 gamma                          | Reg3g                | 0.071                          |
| DNA segment                                          | Chr 1                | 6.5                            | cut-like 2 ( <i>Drosophila</i> )                            | Cut2                 | 0.071                          |
| expressed sequence AA517858                          | AA517858             | 6.5                            | a disintegrin and metalloproteinase domain 3 (cyrtestin)    | Adam3                | 0.069                          |
| C-type lectin domain family 4                        | member e             | 6.5                            | hepcidin antimicrobial peptide 1                            | Hamp1                | 0.067                          |
| visual system homeobox 1 homolog (zebrafish)         | Vsx1                 | 6.4                            | Galactokinase 2                                             | Galk2                | 0.067                          |
| C-type lectin domain family 2                        | member h             | 6.4                            | vomeronasal 1 receptor                                      | V1r                  | 0.067                          |
| G protein-coupled receptor 50                        | Gpr50                | 6.4                            | hepcidin antimicrobial peptide 2                            | Hamp2                | 0.061                          |
| serine peptidase inhibitor                           | Kazal type 3         | 6.3                            | paternally expressed 3                                      | Peg3                 | 0.058                          |
| chitinase 3-like 1                                   | Chi3l1               | 6.3                            | myosin                                                      | heavy polype         | 0.049                          |
| formyl peptide receptor                              | related sequ         | 6.3                            | hypothetical protein LOC100047923                           | LOC10004             | 0.048                          |
| solute carrier family 39 (zinc transporter)          | member 9             | 6.3                            | killer cell lectin-like receptor                            | subfamily A          | 0.047                          |
| phosphatase                                          | orphan 1             | 6.2                            | flavin containing monooxygenase 3                           | Fmo3                 | 0.047                          |
| serine (or cysteine) peptidase inhibitor             | clade B              | 6.2                            | myosin                                                      | heavy polype         | 0.041                          |
| guanine nucleotide binding protein (G protein)       | gamma 4 su           | 6.0                            | eukaryotic translation initiation factor 2                  | subunit 3            | 0.002                          |
| immunoglobulin superfamily                           | member 6             | 6.0                            |                                                             |                      |                                |
| orosomucoid 2                                        | Orm2                 | 6.0                            |                                                             |                      |                                |
| ATP-binding cassette                                 | sub-family           | 5.9                            |                                                             |                      |                                |
| hydroxysteroid (17-beta) dehydrogenase 13            | Hsd17b13             | 5.9                            |                                                             |                      |                                |
| zinc finger protein 286                              | Zfp286               | 5.8                            |                                                             |                      |                                |
| presenilin 1                                         | Psen1                | 5.8                            |                                                             |                      |                                |
| Glucosaminyl (N-acetyl) transferase 2                | I-branching e        | 5.8                            |                                                             |                      |                                |
| <b>caspace 4</b>                                     | <b>apoptosis-re</b>  | <b>5.7</b>                     |                                                             |                      |                                |
| minichromosome maintenance deficient 6 (MIS5 homolog | S. pombe) (S         | 5.7                            |                                                             |                      |                                |
| retinal G protein coupled receptor                   | Rgr                  | 5.7                            |                                                             |                      |                                |
| zinc finger protein 1                                | Zfp1                 | 5.7                            |                                                             |                      |                                |
| T-box brain gene 1                                   | Tbr1                 | 5.6                            |                                                             |                      |                                |
| brain abundant                                       | membrane a           | 5.6                            |                                                             |                      |                                |
| NLR family                                           | pyrin domain         | 5.6                            |                                                             |                      |                                |
| Amyloid beta (A4) precursor protein                  | App                  | 5.6                            |                                                             |                      |                                |
| sperm associated antigen 5                           | Spag5                | 5.5                            |                                                             |                      |                                |
| Mus musculus                                         | clone IMAGE          | 5.5                            |                                                             |                      |                                |
| dynamitin 1-like                                     | Dnm1l                | 5.5                            |                                                             |                      |                                |
| capping protein (actin filament)                     | gelsolin-like        | 5.5                            |                                                             |                      |                                |
| leucine rich repeat transmembrane neuronal 1         | Lrrtm1               | 5.5                            |                                                             |                      |                                |
| lipocalin 2                                          | Lcn2                 | 5.5                            |                                                             |                      |                                |
| armadillo repeat containing                          | X-linked 4           | 5.4                            |                                                             |                      |                                |
| sarcoglycan                                          | gamma                | 5.3                            |                                                             |                      |                                |
| immunoglobulin mu binding protein 2                  | Igmbp2               | 5.3                            |                                                             |                      |                                |
| phosphatidylinositol 3-kinase                        | C2 domain c          | 5.3                            |                                                             |                      |                                |
| eukaryotic translation initiation factor 3           | subunit H            | 5.2                            |                                                             |                      |                                |
| chondroadherin                                       | Chad                 | 5.2                            |                                                             |                      |                                |
| arylsulfatase A                                      | Ansa                 | 5.2                            |                                                             |                      |                                |
| kallikrein 1-related peptidase b16                   | Klk1b16              | 5.2                            |                                                             |                      |                                |
| Nik related kinase                                   | Nrk                  | 5.1                            |                                                             |                      |                                |
| betacellulin                                         | epidermal            | 5.1                            |                                                             |                      |                                |
| transient receptor potential cation channel          | subfamily M          | 5.1                            |                                                             |                      |                                |
| pyrin and HIN domain family                          | member 1             | 5.1                            |                                                             |                      |                                |
| lymphocyte antigen 6 complex                         | locus A              | 5.1                            |                                                             |                      |                                |
| tubulin                                              | beta 2b              | 5.1                            |                                                             |                      |                                |
| RIKEN cDNA A530058N18 gene                           | A530058N18           | 5.1                            |                                                             |                      |                                |
| solute carrier family 15                             | member 3             | 5.0                            |                                                             |                      |                                |
| BCL2/adenovirus E1B interacting protein 1            | NIP2                 | 5.0                            |                                                             |                      |                                |

Supplementary Figure 2. RNA microarray analysis.

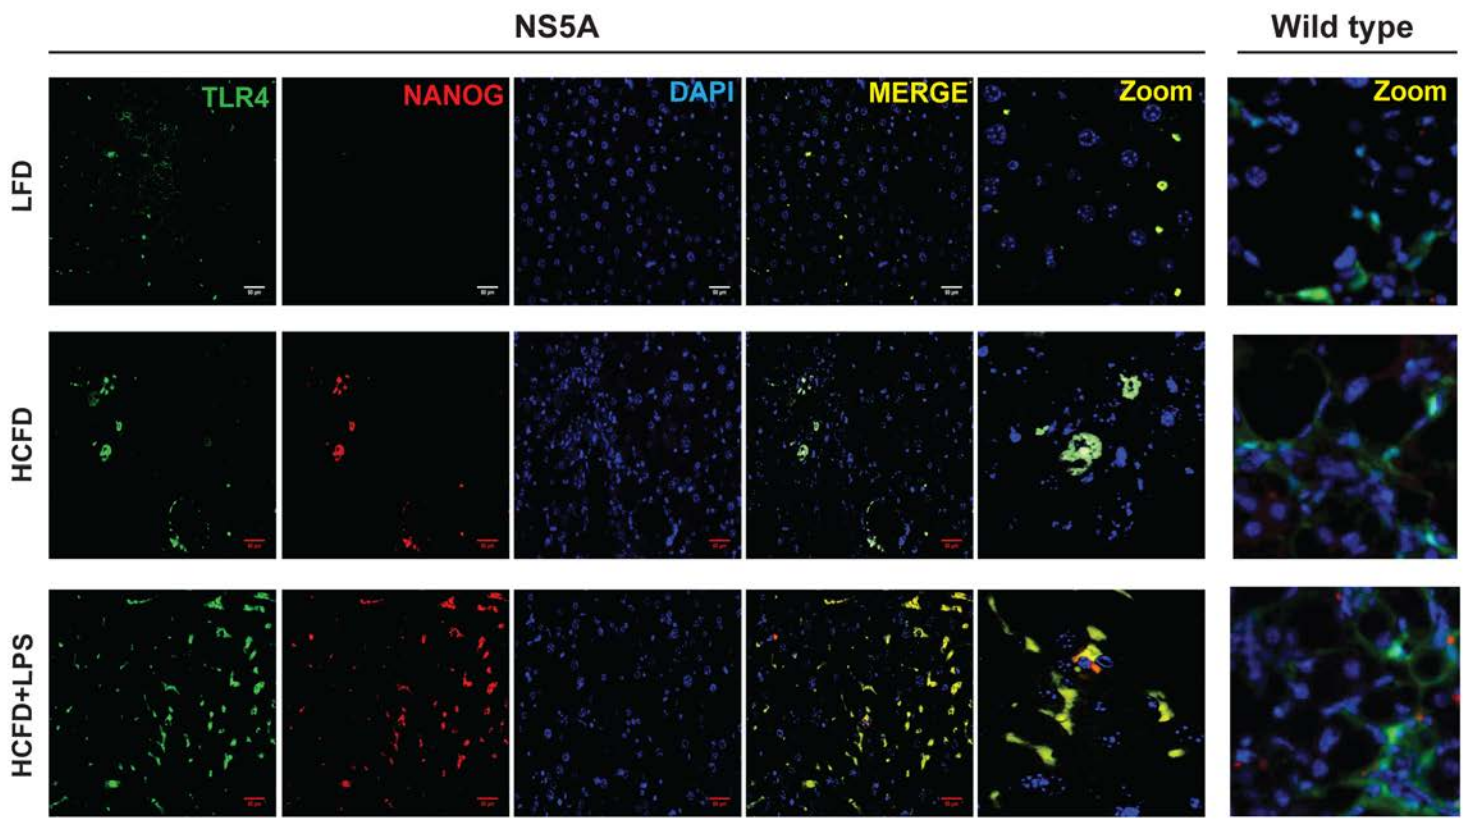

**Supplementary Figure 3. Immunofluorescence staining on mouse liver sections for TLR4 and NANOG.** Note: The TLR4 staining in the low fat diet (LFD) represents non-parenchymal cell (presumably such as Kupffer cells), whereas in liver sections from mice fed HCFD and in mice fed HCFD+LPS, the TLR4 is co-stained with NANOG representing that the origin of TLR4 in these livers is from both TICs and non-parenchymal cells. The scale bar indicates 50 $\mu$ m.

**Suppl. Fig. 3**  
**Uthaya Kumar et al.**



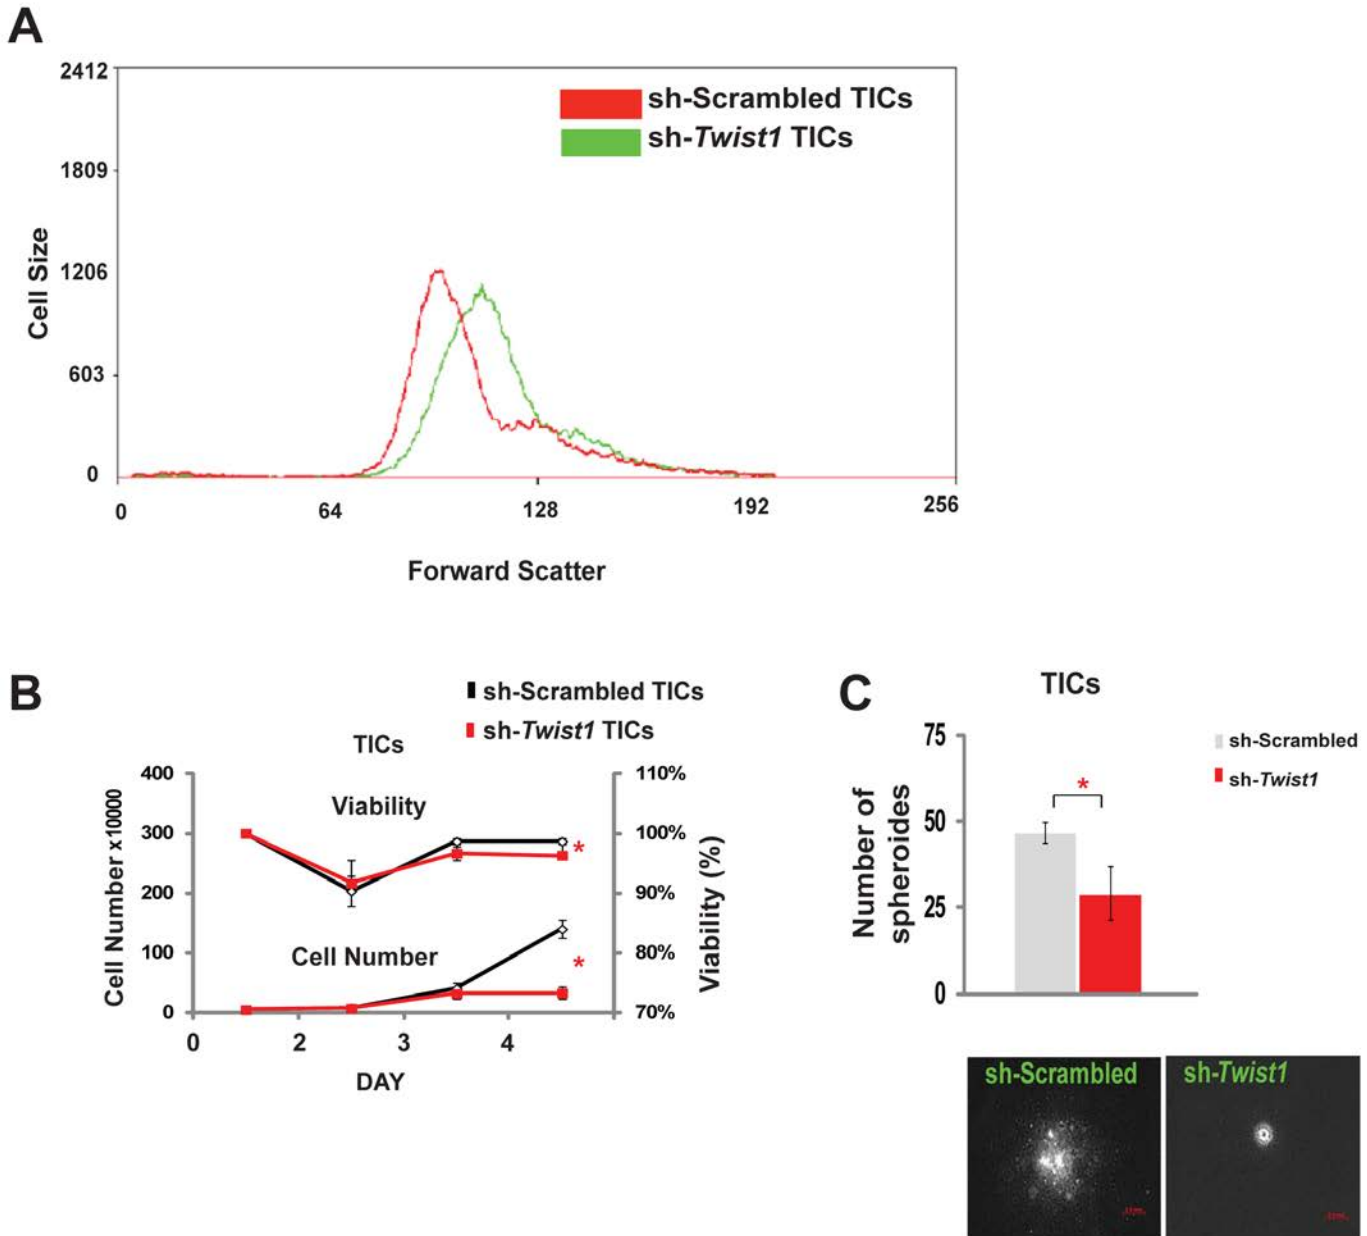

**Supplementary Figure 4. *Twist1* is required for the mesenchymal phenotypes, cell proliferation, and self-renewal abilities of TICs.** (A) Flow cytometry analysis (forward scatter affected by cell size) indicating the change in cell size after *Twist1* knockdown in TICs (B) Analysis of cell number and viability post-infection with Lentivirus expressing sh-*Twist1* or sh-scrambled into TICs; significant decrease in both cell number and viability was seen with the infection of the former compared to the later. \* $P < 0.05$ ,  $n = 5$ . (C) Sphere formation assay demonstrated the significant decrease in the number of spheroids formed when the *Twist1* gene is silenced in TICs. \* $P < 0.05$ ,  $n = 3$ .

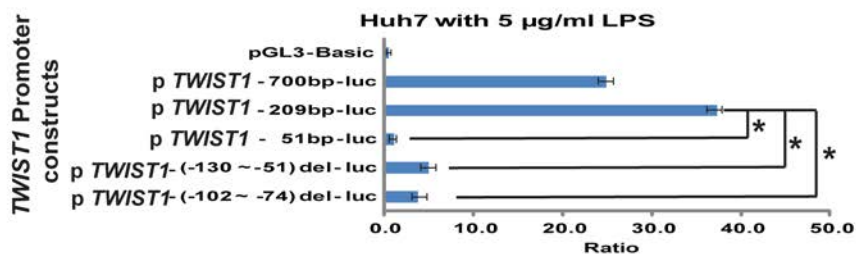

**Supplementary Figure 5. *TWIST1* promoter activation in Huh7 cells.** *TWIST1* promoter analysis with deletion constructs demonstrates the importance of the proximal segments (-209 to -51) in LPS-induced *TWIST1* promoter activity.

Suppl. Figure 5  
Uthaya Kumar *et al.*

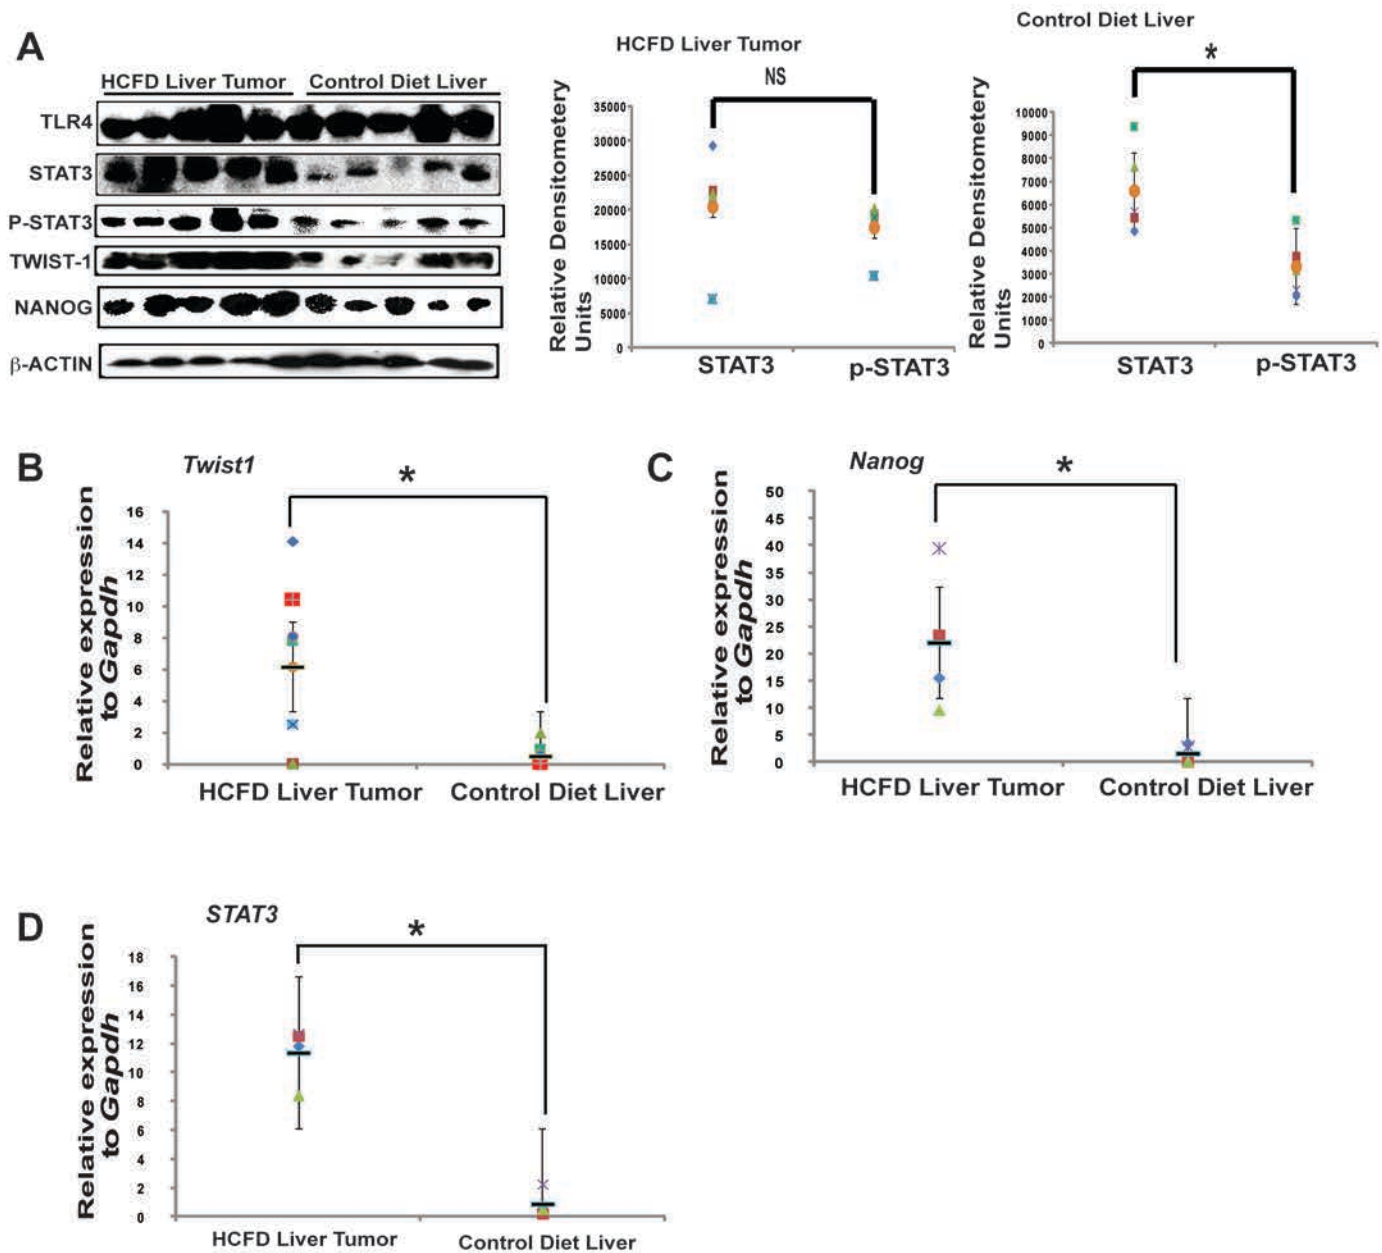

**Supplementary Fig. 6. Induction of TLR4/NANOG/P-STAT3/TWIST1 pathway components**

**in mouse HCC.** (A) TLR4, STAT3, P-STAT3, NANOG and, TWIST1 protein levels are increased in HCC specimens from HCFD NS5ATg mice, as compared with cirrhotic or healthy livers, N = 5 samples/cohort, n=3 (B) *Twist1* (C) *Nanog* (D) *Stat3* mRNA profiling showing significant increase in HCFD NS5A Tg mice Liver tumor, in contrast with the healthy livers, \*p<.05, N=8 samples/cohort, n=3.



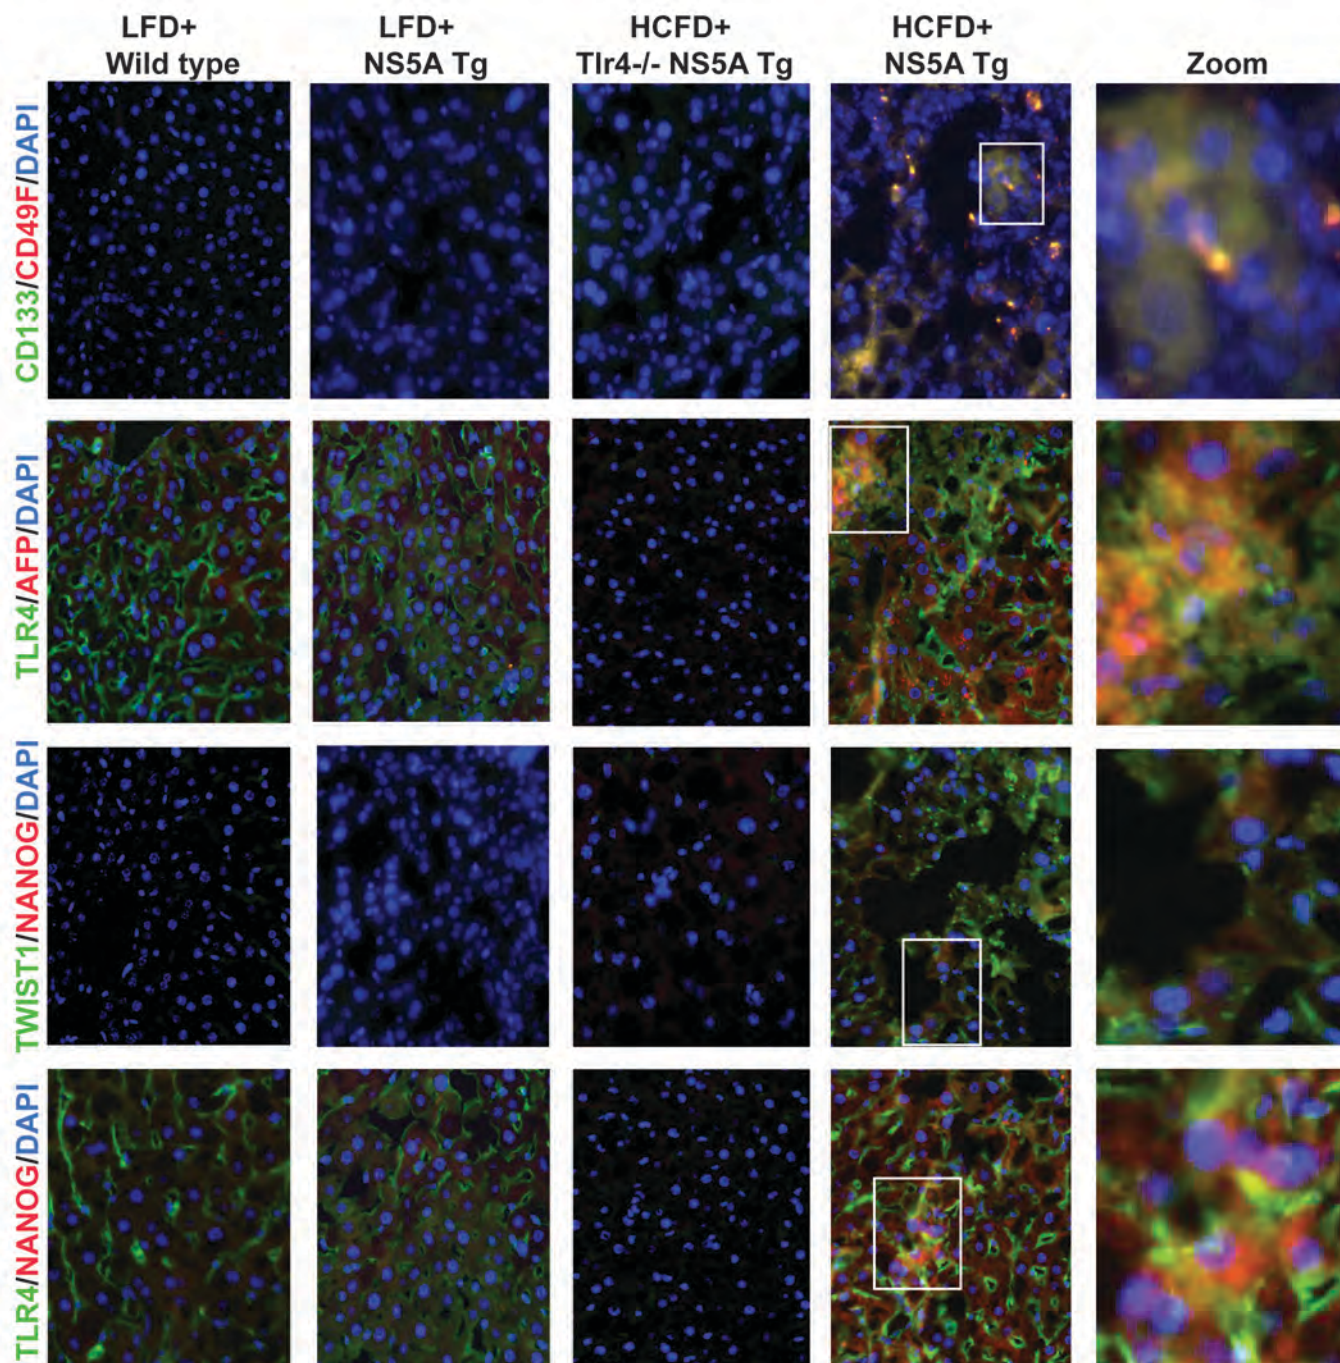

**Supplementary Figure 7. Immunofluorescence staining of mouse liver sections for TLR4, NANOG, TWIST1, AFP, CD133 and CD49F.** Note: Staining of TLR4, NANOG and TWIST1 is reduced in liver sections of *Tlr4*<sup>-/-</sup> NS5A Tg mice fed HCFD for 12 months in comparison to those of wild type and NS5A Tg mice or mice fed low fat diet (LFD). Parenchymal cells of NS5A Tg mice fed LFD have diffuse staining of TLR4 while hepatocytes of wild type mice fed LFD have TLR4 staining mainly in non-parenchymal areas. Note: Liver sections from NS5A Tg mice fed HCFD have co-expression (yellow) of TLR4 (green) and AFP (red) or NANOG (red) mainly in parenchymal cells (with larger nuclei) or TICs.

**Suppl. Fig. 7**  
**Uthaya Kumar et al.**



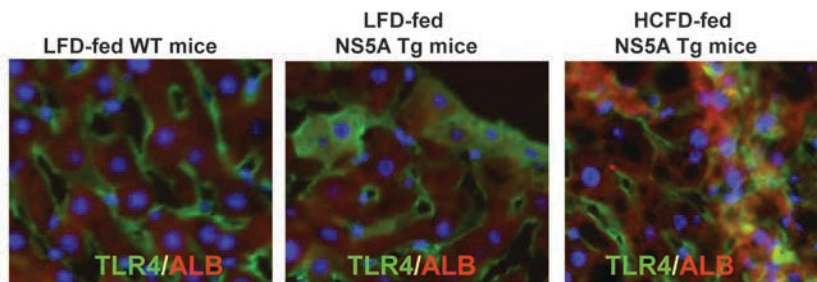

**Supplementary Figure 8. Immunofluorescence analysis of TLR4 and hepatocyte marker in NS5A Tg and wild type mice.** The major source of TLR4 in the liver of wild type mice is from non-parenchymal cells, including the Kupffer cells and stellate cells. The low fat diet (LFD)-fed wild type mice have staining shows TLR4 positive cells, which are presumably Kupffer cells and stellate cells. Liver section of HCFD-fed NS5A Tg mice have TLR4 and NANOG-TLR4-double-positive cells, indicating that TLR4 origin is not only from Kupffer cells and stellate cells but rather from the TICs or hepatocytes. In liver of NS5A Tg mice, both parenchymal and non-parenchymal staining of TLR4 are positive while non-parenchymal area of wild type mice fed LFD mainly have positive staining of TLR4, indicating that hepatocytes and TICs of NS5A Tg mice have elevated levels of TLR4.

**Suppl. Figure 8**  
**Uthaya Kumar *et al.***

### A Cohort from LTCDS, UMINN (N=8, paired)

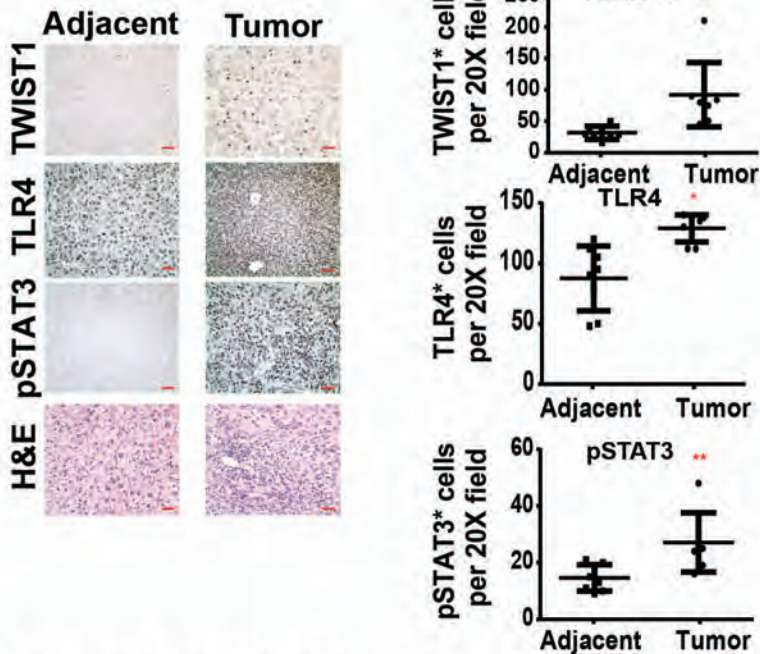

### B Analysis on TCGA samples

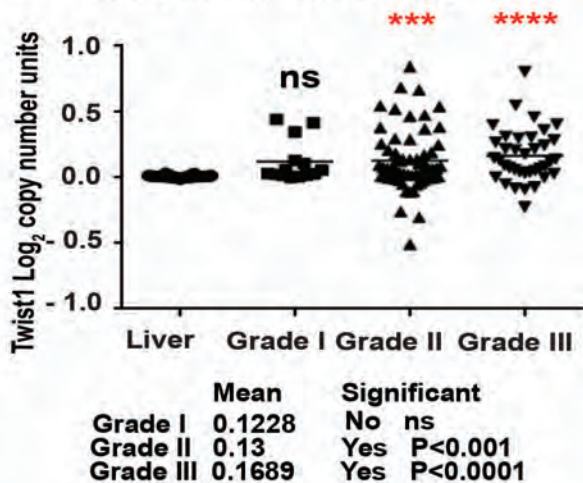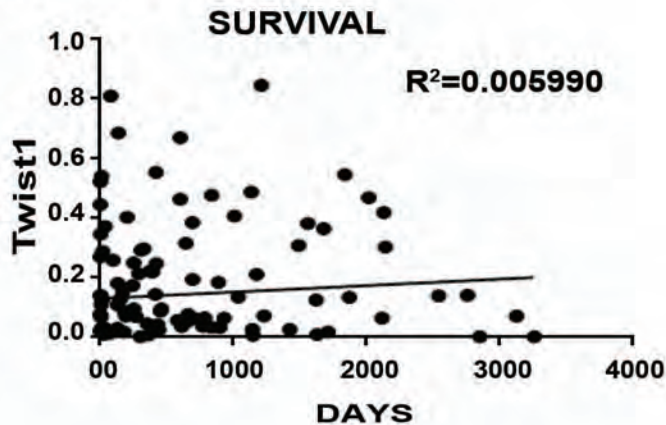

### Supplementary Figure 9. Induction of TLR4, pSTAT3 and TWIST1 in human HCC. (A)

Quantification of immunoperoxidase staining using Metamorph software showed increased staining intensity for Twist1, TLR4 and pSTAT3 in human liver tumors compared to the adjacent non-tumorous livers from Liver Tissue Cell Distribution System (LTCDS) of University of Minnesota (UMinn) (40X magnification; n=8 samples, paired). (B) Analysis of TCGA data of Twist 1 mRNA level different stages of HCC grades and patient survival days with levels of TWIST1 expression.



| Gender | Age at time of operation | Height | Weight | BMI      | Primary Diagnosis Text | Total Cholesterol | AST   | ALT  | Necrosis | Blobar | Tumor Stage "n" not stated | Vascular Invasion | Positive Margins | Intrahepatic metastasis | Tumor Grade Iwell 2mod 3poor 4und ncan't assess bc of necrosis | Multifocal (tryes) | Microvascular Invasion | Macrovascular Invasion | steatohepatitis | Steatosis (0-5%) | Cirrhosis | Fibrosis | Site of mets                                                                            |
|--------|--------------------------|--------|--------|----------|------------------------|-------------------|-------|------|----------|--------|----------------------------|-------------------|------------------|-------------------------|----------------------------------------------------------------|--------------------|------------------------|------------------------|-----------------|------------------|-----------|----------|-----------------------------------------------------------------------------------------|
| M      | 68                       | 1.78   | 89     | 28.73192 | EtoH                   | 142               | 471   | 457  | 1        | 1      | T2                         | 1                 | 0                | 0                       | 1                                                              | 1                  | 1                      | 0                      | 0               | 0                | 1         | 1        |                                                                                         |
| F      | 66                       | 1.52   | 73     | 31.59626 | AH                     | 425               | 543   | 391  | 0        | 0      | T2                         | 1                 | 0                | 0                       | 1                                                              | 0                  | 1                      | 0                      | 0               | 1                | 1         | 1        |                                                                                         |
| M      | 65                       | 1.778  | 77.3   | 24.45209 | Hep C                  | 142               | 9612  | 3029 | 1        | 0      | T2                         | 0                 | 0                | 0                       | 2                                                              | 1                  | 0                      | 0                      | 0               | 0                | 0         | 1        |                                                                                         |
| M      | 67                       | 1.7    | 77     | 26.6436  | Hep B                  | 156               | 1548  | 815  | 0        | 1      | T3a                        | 0                 | 0                | 0                       | 1                                                              | 1                  | 0                      | 0                      | 0               | 0                | 0         | 1        |                                                                                         |
| M      | 51                       | 1.78   | 84     | 26.5118  | Hep B                  | 126               | 1467  | 489  | 0        | 0      | T1                         | 0                 | 0                | 0                       | 1                                                              | 0                  | 0                      | 0                      | 0               | 0                | 0         | 1        |                                                                                         |
| F      | 59                       | 1.65   | 81     | 29.75207 | Hep C                  | 210               | 824   | 889  | 0        | 1      | T2                         | 1                 | 0                | 0                       | 2                                                              | 1                  | 1                      | 0                      | 0               | 0                | 0         | 1        |                                                                                         |
| M      | 67                       | 1.78   | 71     | 22.40879 | EtoH                   | n/a               | 2173  | 1407 | 0        | 0      | T1                         | 0                 | 0                | 0                       | 3                                                              | 0                  | 0                      | 0                      | 0               | 0                | 0         | 1        |                                                                                         |
| M      | 64                       | 1.63   | 67     | 25.21736 | Hep C                  | 99                | 413   | 200  | 1        | 0      | T2                         | 0                 | 0                | 0                       | 2                                                              | 1                  | 0                      | 0                      | 0               | 0                | 0         | 1        |                                                                                         |
| M      | 52                       | 1.68   | 53     | 18.77834 | PrLiv Mal              | 193               | 2088  | 1019 | 0        | 0      | T1                         | 0                 | 0                | 0                       | 4                                                              | 0                  | 0                      | 0                      | 0               | 0                | 0         | 1        |                                                                                         |
| M      | 71                       | 1.75   | 83     | 27.10204 | n/a                    | n/a               | n/a   | n/a  | 0        | 0      | T2                         | 1                 | 0                | 0                       | n/a                                                            | 0                  | 1                      | 1                      | 0               | 0                | 0         | 0        |                                                                                         |
| F      | 63                       | 1.6    | 58     | 22.55625 | PrLiv Mal              | 224               | 1980  | 1228 | 1        | 1      | T2                         | 0                 | 0                | 0                       | 2                                                              | 1                  | 0                      | 0                      | 0               | 0                | 0         | 1        |                                                                                         |
| M      | 68                       | 1.691  | 77.3   | 28.35964 | Crypto                 | 228               | 4992  | 1871 | 0        | 0      | T1                         | 0                 | 0                | 0                       | 3                                                              | 0                  | 0                      | 0                      | 0               | 0                | 1         | 1        |                                                                                         |
| F      | 61                       | 1.55   | 50     | 20.81165 | Hep C                  | 116               | 1289  | 663  | 0        | 0      | T2                         | 1                 | 0                | 0                       | 3                                                              | 1                  | 1                      | 0                      | 0               | 0                | 1         | 1        |                                                                                         |
| M      | 61                       | 1.83   | 89     | 26.57599 | Hep C                  | 162               | 1548  | 797  | 0        | 0      | T1                         | 0                 | 0                | 0                       | 3                                                              | 0                  | 0                      | 0                      | 0               | 0                | 0         | 1        |                                                                                         |
| M      | 56                       | 1.73   | 62     | 27.39818 | Hep C                  | 28                | 3452  | 878  | 0        | 0      | T2                         | 1                 | 0                | 0                       | 2                                                              | 1                  | 1                      | 0                      | 0               | 0                | 0         | 1        |                                                                                         |
| M      | 59                       | 1.66   | 62     | 22.77319 | EtoH                   | 137               | 1785  | 731  | 1        | 0      | T3a                        | 1                 | 0                | 0                       | 3                                                              | 1                  | 1                      | 0                      | 0               | 0                | 0         | 1        |                                                                                         |
| M      | 68                       | 1.83   | 105    | 31.26368 | EtoH                   | 138               | 1125  | 1057 | 0        | 1      | T2                         | 1                 | 0                | 0                       | 3                                                              | 1                  | 1                      | 0                      | 0               | 0                | 0         | 1        |                                                                                         |
| M      | 62                       | 1.7    | 93     | 32.17993 | Hep C                  | 173               | 490   | 219  | 1        | 0      | T2                         | 1                 | 0                | 0                       | 3                                                              | 1                  | 1                      | 0                      | 0               | 0                | 0         | 1        |                                                                                         |
| M      | 65                       | 1.8    | 81     | 25       | Hep C                  | 107               | 759   | 503  | 1        | 0      | T1                         | 1                 | 0                | 0                       | 0                                                              | 1                  | 0                      | 0                      | 0               | 0                | 0         | 1        |                                                                                         |
| M      | 69                       | 1.8    | 91     | 28.08642 | Hep C                  | 168               | 5142  | 1168 | 0        | 0      | T3b                        | 1                 | 0                | 0                       | 3                                                              | 0                  | 1                      | 1                      | 0               | 0                | 0         | 1        |                                                                                         |
| M      | 66                       | 1.73   | 87     | 29.0688  | Hep C                  | 122               | 5086  | 3287 | 0        | 1      | T2                         | 1                 | 0                | 0                       | 2                                                              | 0                  | 1                      | 0                      | 0               | 0                | 1         | 1        | Lungs, ribs                                                                             |
| M      | 65                       | 1.7    | 72     | 24.91349 | Hep B                  | 201               | 649   | 488  | 0        | 0      | T1                         | 0                 | 0                | 0                       | 1                                                              | 0                  | 0                      | 0                      | 0               | 0                | 0         | 1        |                                                                                         |
| M      | 60                       | 1.7    | 72     | 26.84061 | Hep C                  | 117               | 2023  | 1722 | 1        | 1      | T2                         | 1                 | 0                | 0                       | 2                                                              | 1                  | 1                      | 0                      | 0               | 0                | 0         | 1        |                                                                                         |
| M      | 66                       | 1.85   | 79.5   | 23.22963 | n/a                    | n/a               | n/a   | n/a  | 0        | 0      | T1                         | 0                 | 0                | 0                       | 2                                                              | 1                  | 0                      | 0                      | 0               | 0                | 0         | 1        | 0                                                                                       |
| M      | 68                       | 1.79   | 86     | 26.84061 | ALF                    | 156               | 1009  | 400  | 0        | 0      | T2                         | 0                 | 0                | 0                       | 3                                                              | 1                  | 0                      | 0                      | 0               | 0                | 0         | 1        |                                                                                         |
| M      | 68                       | 1.83   | 80     | 23.88844 | Hep B                  | 180               | 765   | 444  | 1        | 1      | T2                         | 0                 | 0                | 0                       | 3                                                              | 1                  | 0                      | 0                      | 0               | 0                | 0         | 1        | Abdominal nodes, liver                                                                  |
| M      | 61                       | 1.67   | 96     | 34.42217 | Hep C                  | 87                | 1418  | 1130 | 0        | 0      | T2                         | 1                 | 0                | 0                       | 3                                                              | 0                  | 0                      | 0                      | 0               | 0                | 0         | 1        |                                                                                         |
| M      | 34                       | 1.75   | 71     | 23.18367 | Hep B                  | 160               | 3635  | 911  | 1        | 1      | T3a                        | 1                 | 0                | 0                       | 3                                                              | 1                  | 1                      | 0                      | 0               | 0                | 0         | 1        |                                                                                         |
| F      | 54                       | 1.631  | 54.1   | 20.33711 | Hep C                  | 166               | 141   | 73   | 0        | 0      | T3b                        | 1                 | 0                | 0                       | 2                                                              | 0                  | 1                      | 1                      | 0               | 0                | 0         | 1        | Lungs, r adrenal                                                                        |
| M      | 48                       | 1.699  | 69.1   | 23.93819 | Hep C                  | 184               | 8942  | 1014 | 0        | 0      | T1                         | 0                 | 0                | 0                       | 2                                                              | 0                  | 0                      | 0                      | 0               | 1                | 1         | 1        |                                                                                         |
| M      | 64                       | 1.78   | 86     | 27.14304 | PrLiv Mal              | 97                | 7825  | 4690 | 1        | 0      | T2                         | 0                 | 0                | 0                       | 2                                                              | 1                  | 0                      | 0                      | 0               | 0                | 0         | 1        |                                                                                         |
| M      | 74                       | n/a    | 75.29  | n/a      | n/a                    | n/a               | n/a   | n/a  | 0        | 0      | T1                         | 0                 | 0                | 0                       | 2                                                              | 0                  | 0                      | 0                      | 0               | 0                | 0         | 0        | 1                                                                                       |
| M      | 48                       | 1.73   | 81     | 27.06405 | Hep C                  | 178               | 1138  | 487  | 1        | 0      | T1                         | 0                 | 0                | 0                       | 2                                                              | 0                  | 0                      | 0                      | 0               | 0                | 0         | 0        | 1                                                                                       |
| F      | 54                       | 1.6    | 43     | 18.79688 | PrLiv Mal              | 186               | 2279  | 2082 | 0        | 0      | T3a                        | 0                 | 0                | 0                       | 1                                                              | 1                  | 0                      | 0                      | 0               | 0                | 0         | 1        |                                                                                         |
| F      | 46                       | 1.52   | 70     | 30.29778 | Hep C                  | 144               | 2096  | 496  | 0        | 1      | T2                         | 0                 | 0                | 0                       | 4                                                              | 1                  | 0                      | 0                      | 0               | 0                | 0         | 1        |                                                                                         |
| M      | 57                       | 1.56   | 76     | 31.22946 | Hep C                  | 121               | 11664 | 1375 | 1        | 1      | T3a                        | 0                 | 0                | 0                       | 2                                                              | 1                  | 0                      | 0                      | 0               | 0                | 0         | 1        |                                                                                         |
| M      | 60                       | 1.7    | 67     | 23.15339 | Hep C                  | 129               | 4992  | 3658 | 1        | 1      | T2                         | 0                 | 0                | 0                       | 2                                                              | 1                  | 0                      | 0                      | 0               | 0                | 0         | 1        |                                                                                         |
| M      | 73                       | 1.8    | 88     | 20.97165 | Hep C                  | 130               | 2942  | 862  | 1        | 0      | T1                         | 0                 | 0                | 0                       | 2                                                              | 0                  | 0                      | 0                      | 0               | 0                | 0         | 1        |                                                                                         |
| M      | 42                       | 1.626  | 43.3   | 50.04017 | Hep C                  | 165               | 433   | 335  | 0        | 0      | T3a                        | 1                 | 0                | 0                       | 2                                                              | 1                  | 1                      | 0                      | 0               | 0                | 0         | 1        |                                                                                         |
| F      | 71                       | 1.52   | 81     | 35.05896 | Hep C                  | 151               | 4385  | 1047 | 1        | 1      | T2                         | 0                 | 0                | 0                       | 1                                                              | 1                  | 0                      | 0                      | 0               | 0                | 0         | 1        |                                                                                         |
| M      | 53                       | 1.78   | 102    | 32.1929  | EtoH                   | 164               | 21    | 29   | 1        | 0      | T2                         | 1                 | 0                | 0                       | 3                                                              | 0                  | 1                      | 0                      | 0               | 0                | 0         | 1        |                                                                                         |
| F      | 66                       | 1.52   | 77     | 33.32758 | Hep C                  | 89                | 4500  | 1288 | 1        | 0      | T2                         | 1                 | 0                | 0                       | 3                                                              | 1                  | 0                      | 0                      | 1               | 1                | 1         | 1        |                                                                                         |
| M      | 49                       | 1.96   | 65     | 17.09402 | HCV                    | n/a               | n/a   | n/a  | 1        | 0      | T3a                        | 1                 | 0                | 0                       | 3                                                              | 1                  | 1                      | 1                      | 1               | 0                | 0         | 0        |                                                                                         |
| M      | 67                       | 1.88   | 102    | 28.85921 | Hep B                  | 48                | 402   | 413  | 0        | 1      | T2                         | 1                 | 0                | 0                       | 2                                                              | 1                  | 1                      | 0                      | 0               | 0                | 0         | 1        |                                                                                         |
| M      | 62                       | n/a    | 57     | n/a      | Hep C                  | 188               | 2792  | 320  | 1        | 0      | T2                         | 0                 | 0                | 0                       | 2                                                              | 1                  | 0                      | 0                      | 1               | 0                | 0         | 1        |                                                                                         |
| M      | 75                       | 1.77   | 93.4   | 29.81263 | n/a                    | n/a               | n/a   | n/a  | 0        | 0      | T3a                        | 0                 | 1                | 1                       | 3                                                              | 1                  | 1                      | 0                      | 0               | 0                | 0         | 0        |                                                                                         |
| M      | 65                       | 1.7    | 80     | 27.59166 | Hep B                  | 82                | 1179  | 578  | 0        | 0      | T2                         | 0                 | 0                | 0                       | 2                                                              | 1                  | 0                      | 0                      | 0               | 1                | 1         | 1        |                                                                                         |
| M      | 55                       | 1.83   | 106    | 31.65218 | Hep C                  | 174               | 67    | 28   | 1        | 1      | T3b                        | 1                 | 0                | 0                       | 3                                                              | 1                  | 1                      | 1                      | 0               | 0                | 0         | 1        | abdomen, lungs                                                                          |
| M      | 49                       | 1.78   | 76     | 23.98987 | Hep C                  | 95                | 284   | 598  | 0        | 0      | T1                         | 0                 | 0                | 0                       | 2                                                              | 0                  | 0                      | 0                      | 0               | 0                | 0         | 1        |                                                                                         |
| M      | 58                       | 1.8    | 93     | 28.7037  | Hep C                  | 270               | 262   | 386  | 0        | 0      | T2                         | 1                 | 0                | 0                       | 3                                                              | 1                  | 1                      | 0                      | 0               | 0                | 0         | 1        |                                                                                         |
| M      | 60                       | 1.77   | 79     | 25.21625 | n/a                    | n/a               | n/a   | n/a  | 0        | 0      | T1                         | 0                 | 0                | 0                       | 3                                                              | 0                  | 1                      | 0                      | 0               | 0                | 0         | 0        |                                                                                         |
| M      | 53                       | 1.7    | 72     | 24.91349 | Hep C                  | 107               | 6736  | 2709 | 1        | 0      | T2                         | 1                 | 0                | 0                       | 3                                                              | 0                  | 1                      | 0                      | 0               | 0                | 0         | 1        |                                                                                         |
| M      | 51                       | 1.6    | 103    | 40.23438 | Hep C                  | 191               | 515   | 303  | 0        | 0      | T1                         | 0                 | 0                | 0                       | 2                                                              | 0                  | 0                      | 0                      | 0               | 0                | 0         | 1        |                                                                                         |
| M      | 60                       | 1.7    | 80     | 17.30104 | PrLiv Mal              | 163               | 1573  | 810  | 1        | 0      | T1                         | 0                 | 0                | 0                       | 2                                                              | 0                  | 0                      | 0                      | 0               | 0                | 0         | 1        |                                                                                         |
| M      | 56                       | 1.72   | 73     | 24.6755  | HBV                    | n/a               | n/a   | n/a  | 0        | 0      | T1                         | 0                 | 0                | 0                       | 2                                                              | 0                  | 0                      | 0                      | 1               | 0                | 0         | 0        | lung                                                                                    |
| M      | 54                       | 1.7    | 73     | 25.25952 | Hep C                  | 219               | 878   | 443  | 1        | 1      | T2                         | 0                 | 0                | 0                       | 2                                                              | 1                  | 0                      | 0                      | 0               | 0                | 0         | 1        |                                                                                         |
| M      | 70                       | 1.64   | 56     | 20.82094 | HCV                    | n/a               | n/a   | n/a  | 0        | 0      | T1                         | 0                 | 0                | 0                       | 2                                                              | 0                  | 1                      | 0                      | 0               | 0                | 0         | 0        | 1                                                                                       |
| M      | 52                       | 1.68   | 59     | 20.9042  | Hep B                  | 244               | 2659  | 568  | 1        | 0      | T3a                        | 1                 | 0                | 0                       | 4                                                              | 1                  | 1                      | 0                      | 0               | 0                | 0         | 1        | Liver, Lung, peritoneum                                                                 |
| M      | 59                       | 1.4    | 51     | 26.02041 | Hep C                  | 225               | 1771  | 460  | 1        | 0      | T3a                        | 1                 | 0                | 0                       | 2                                                              | 1                  | 1                      | 0                      | 0               | 0                | 0         | 1        |                                                                                         |
| F      | 55                       | 1.57   | 60.4   | 24.80404 | HBV                    | n/a               | n/a   | n/a  | 0        | 0      | T1                         | 0                 | 0                | 0                       | 2                                                              | 0                  | 0                      | 0                      | 0               | 0                | 0         | 0        | lung                                                                                    |
| M      | 64                       | 1.86   | 90     | 26.29697 | Hep C                  | 118               | 306   | 93   | 0        | 0      | T1                         | 0                 | 0                | 0                       | 2                                                              | 0                  | 0                      | 0                      | 0               | 0                | 0         | 1        |                                                                                         |
| M      | 56                       | 1.73   | 91     | 30.40529 | Hep C                  | 101               | 631   | 254  | 0        | 0      | T1                         | 0                 | 0                | 0                       | 2                                                              | 0                  | 0                      | 0                      | 0               | 0                | 0         | 1        |                                                                                         |
| M      | 48                       | 1.68   | 62     | 21.96712 | Hep C                  | 122               | 372   | 305  | 1        | 0      | T2                         | 1                 | 0                | 0                       | 3                                                              | 1                  | 1                      | 0                      | 0               | 0                | 0         | 1        |                                                                                         |
| M      | 55                       | 1.75   | 80     | 26.12245 | Hep B                  | 213               | 1764  | 778  | 1        | 1      | T3b                        | 1                 | 0                | 0                       | 2                                                              | 1                  | 0                      | 1                      | 1               | 0                | 0         | 1        | Lungs, liver, then with progression to L adrenal, pelvis                                |
| M      | 63                       | 1.8    | 120    | 37.03704 | Crypto                 | 177               | 4207  | 1270 | 0        | 0      | T2                         | 0                 | 0                | 0                       | 3                                                              | 1                  | 0                      | 0                      | 0               | 1                | 1         | 1        |                                                                                         |
| M      | 59                       | 1.65   | 74     | 27.1809  | Crypto                 | 199               | 4620  | 2386 | 0        | 1      | T4                         | 1                 | 0                | 0                       | 3                                                              | 1                  | 1                      | 1                      | 1               | 1                | 1         | 1        | Pelvic mas, lung lesions with innumerable liver lesions, carcinomatosis in 1 years time |
| M      | 53                       | 1.72   | 80     | 27.04164 | Hep B                  | 184               | 1235  | 684  | 0        | 1      | T3a                        | 1                 | 0                | 0                       | 3                                                              | 1                  | 1                      | 0                      | 0               | 0                | 0         | 1        | progressive spinal mets                                                                 |
| M      | 67                       | n/a    | n/a    | n/a      | Misc                   | n/a               | 8989  | 2085 | 0        | 0      | T2                         | 1                 | 0                | 0                       | 2                                                              | 1                  | 1                      | 0                      | 0               | 0                | 0         | 1        |                                                                                         |
| M      | 81                       | 1.78   | 70     | 22.09317 | PrLiv Mal              | 166               | 925   | 726  | 0        | 1      | T3b                        | 1                 | 0                | 0                       | 2                                                              | 1                  | 0                      | 1                      | 0               | 0                | 0         | 1        | Liver, lungs, iliac bone                                                                |
| M      | 55                       | 1.72   | 94     | 31.77393 | Hep C                  | 165               | 3181  | 1707 | 1        | 0      | T2                         | 1                 | 0                | 0                       | 2                                                              | 0                  | 1                      | 0                      | 0               | 0                | 0         | 1        |                                                                                         |
| M      | 67                       | 1.7    | 93     | 32.17993 | NASH                   | 234               | 1217  | 994  | 0        | 0      | T1                         | 0                 | 0                | 0                       | 2                                                              | 0                  | 0                      | 0                      | 1               | 0                | 0         | 1        |                                                                                         |
| M      | 57                       | 1.83   | 88     | 26.27279 | Hep C                  | 150               | 337   | 200  | 1        | 1      | T2                         | 0                 | 0                | 0                       | 2                                                              | 1                  | 0                      | 0                      | 0               | 0                | 0         | 1        |                                                                                         |
| F      | 47                       | 1.54   | 52.8   | 22.26345 | HBV                    | n/a               | n/a   | n/a  | 0        | 0      | T1                         | 0                 | 0                | 0                       | 2                                                              | 1                  | 0                      | 0                      | 0               | 0                | 0         | 0        | 1                                                                                       |



**Supplemental Fig. 10. Clinical patient dataset summary used in this study.**

Generally 1=present, 0=absent unless otherwise indicated.

Primary diagnosis text=clinical indication for transplantation

Necrosis=tumor necrosis

PrLivMal=primary liver malignancy

Crypto=cryptogenic cirrhosis

**Suppl. Figure 10**  
**Uthaya Kumar *et al.***

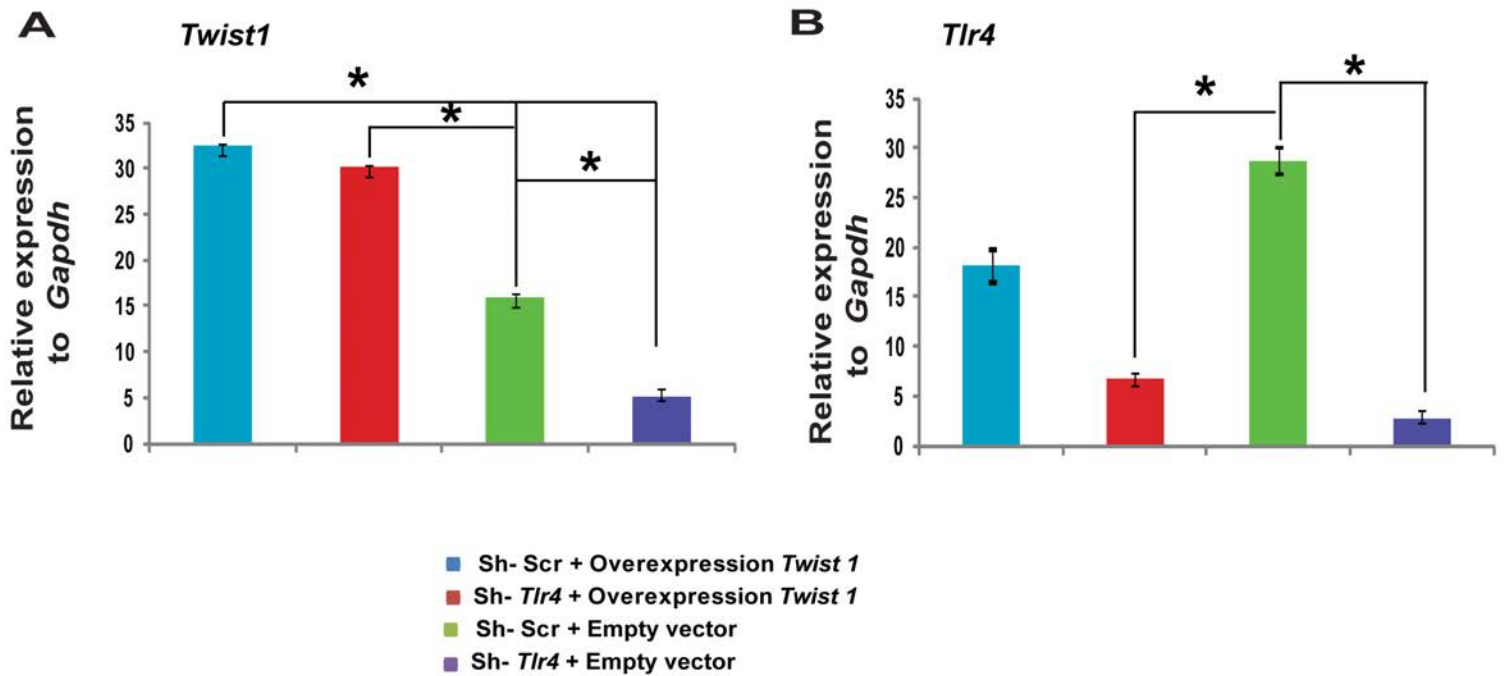

**Supplementary Fig.11. *Twist1* by its very nature promotes tumor formation.** (A) *Twist1* mRNA was analyzed using qRT-PCR in TICs post *Tlr4* silencing and *Twist1* overexpression, n=3. (B) *Tlr4* mRNA was analyzed using qRT-PCR in TICs post *Tlr4* silencing and *Twist1* overexpression, n=3.

**Supplementary Table 1: Clinicopathological Features of Patients with Hepatocellular Carcinoma**

| <b>Feature</b>           | <b>Value</b>           |
|--------------------------|------------------------|
| <b>Age (years)</b>       | 59±8.51* (34-77)       |
| <b>Gender</b>            |                        |
| <b>Male</b>              | 93                     |
| <b>Female</b>            | 20                     |
| <b>BMI</b>               | 27±0.05* (19-50)       |
| <b>Total Cholesterol</b> | 157±0.48* (48-425)     |
| <b>AST</b>               | 2124±21.74* (21-11802) |
| <b>ALT</b>               | 843±7.25* (55-3838)    |
| <b>Primary Diagnosis</b> |                        |
| <b>PrLive Mal</b>        | 7                      |
| <b>NASH</b>              | 5                      |
| <b>Crypto</b>            | 4                      |
| <b>HBV</b>               | 21                     |
| <b>HCV</b>               | 60                     |
| <b>Tumor stage</b>       |                        |
| <b>T1</b>                | 40                     |
| <b>T2</b>                | 46                     |
| <b>T3a</b>               | 16                     |
| <b>T3b</b>               | 9                      |
| <b>T4</b>                | 2                      |
| <b>Tumor Grade</b>       |                        |
| <b>1</b>                 | 19                     |
| <b>2</b>                 | 64                     |
| <b>3</b>                 | 35                     |
| <b>4</b>                 | 3                      |
| <b>Metastasis</b>        | 16                     |

\* Value = Mean ± SEM



**Supplementary Table 2. Liver histological grading of HCV NS5A Tg mice fed the low-fat diet, HCFD or HCFD+LPS for 12 months.**

|                         | Diet         | Fatty liver<br>(0-4+) | Spotty necrosis<br>(0-2+) | Dysplasia<br>(0-4+)        | Inflammation<br>(0-2+)     |
|-------------------------|--------------|-----------------------|---------------------------|----------------------------|----------------------------|
| WT                      | Low fat diet | 0.1 ± 0.1             | 0.1 ± 0.2                 | 0.2 ± 0.1                  | 0.2 ± 0.3                  |
| NS5A Tg                 | Low fat diet | 0.1 ± 0.2             | 0.1 ± 0.1                 | 0.1 ± 0.1 <sup>NS</sup>    | 0.2 ± 0.2 <sup>NS</sup>    |
| <i>Tlr4</i> -/-         | Low fat diet | 0                     | 0.1 ± 0.3                 | 0.1 ± 0.4 <sup>NS</sup>    | 0.1 ± 0.2 <sup>NS</sup>    |
| <i>Tlr4</i> -/- NS5A Tg | Low fat diet | 0.1 ± 0.1             | 0.2 ± 0.1                 | 0.2 ± 0.3 <sup>NS</sup>    | 0.2 ± 0.3 <sup>NS</sup>    |
| WT                      | HCFD         | 2.3 ± 0.8             | 0.6 ± 0.2                 | 0.2 ± 0.1 <sup>NS</sup>    | 0.6 ± 0.4 <sup>NS</sup>    |
| NS5A Tg                 | HCFD         | 3.5 ± 0.6             | 1.1 ± 0.3*                | 1.4 ± 0.5 <sup>*/*</sup>   | 1.2 ± 0.4 <sup>*/*</sup>   |
| <i>Tlr4</i> -/-         | HCFD         | 1.0 ± 0.7             | 0.4 ± 0.3                 | 0.1 ± 0.2 <sup>NS/NS</sup> | 0.4 ± 0.4 <sup>NS/NS</sup> |
| <i>Tlr4</i> -/- NS5A Tg | HCFD         | 1.2 ± 0.8             | 0.5 ± 0.5                 | 0.3 ± 0.5 <sup>NS/NS</sup> | 0.5 ± 0.2 <sup>NS/NS</sup> |
| WT                      | HCFD + LPS   | 2.7 ± 0.7             | 0.7 ± 0.3                 | 0.3 ± 0.3 <sup>NS/NS</sup> | 0.7 ± 0.3 <sup>NS/NS</sup> |
| NS5A Tg                 | HCFD + LPS   | 3.7 ± 1.1             | 1.3 ± 0.5*                | 1.8 ± 0.6 <sup>**/**</sup> | 1.7 ± 0.6 <sup>**/**</sup> |
| <i>Tlr4</i> -/-         | HCFD + LPS   | 1.2 ± 0.5             | 0.3 ± 0.3                 | 0.2 ± 0.6 <sup>NS/NS</sup> | 0.2 ± 0.4 <sup>NS/NS</sup> |
| <i>Tlr4</i> -/- NS5A Tg | HCFD + LPS   | 1.5 ± 0.7             | 0.3 ± 0.6*                | 0.5 ± 0.4 <sup>NS/NS</sup> | 0.4 ± 0.5 <sup>NS/NS</sup> |

\**P* < 0.05, compared to respective HCFD diet-fed WT mice; \*\**P* < 0.05, compared to respective HCFD diet-fed NS5A Tg mice; #*P* < 0.05, compared to HCFD plus LPS-fed WT mice. Fatty liver, 2+: 25%~50% hepatocytes with fat; 3+: 50%~75% with fat; 4+: >75% with fat. Inflammation, 1+: lesions encompassing less than 1/3 acinus; 2+: lesions larger than whole acini.

(WT-HCFD; \*, *P*<0.05 \*\*, *P*<0.01 \*\*\*, *P*<0.005, green scripts and symbols – statistical analysis in comparison to low fat diet (LFD), purple scripts and symbols - statistical analysis in comparison to HCFD)

**Supplementary Table 3: Antibody list**

| Antibody | Manufacturer                         |
|----------|--------------------------------------|
| TWIST1   | SC-15393 (Santa Cruz Bio Technology) |
| NANOG    | ab80892 (Abcam)                      |
| STAT3    | #9139S (Cell Signalling)             |
| P-STAT3  | #9134S (Cell Signalling)             |
| TLR4     | SC-10741 (Santa Cruz Bio Technology) |

|         |                                     |
|---------|-------------------------------------|
| TAK1    | SC-7162 (Santa Cruz Bio Technology) |
| TRAF6   | SC-7221 (Santa Cruz Bio Technology) |
| IKK-B   | SC-8014 (Santa Cruz Bio Technology) |
| P-IKK-B | #2694 (Cell Signalling)             |
| B-ACTIN | A5441 (SIGMA)                       |

**Supplementary Table 4: qRT-PCR primer sets**

| Gene           | Forward primer (5'-3')        | Reverse primer (5'-3')        |
|----------------|-------------------------------|-------------------------------|
| <i>Twist-1</i> | AGA TGT CAT TGT TTC CAG AGA   | TTA GTT ATC CAG CTC CAG AGT   |
| <i>Nanog</i>   | AGG GTC TGC TA TGA GAT GCT    | CAA CCA CTG GTT TTT CTG CCA   |
| <i>Stat3</i>   | GCC ACG TTG GTG TTT CAT AAT C | TTC GAA GGT TGT GCT GAT AGA G |
| <i>Tlr4</i>    | ATG GCA TGG CTT ACA CCA CC    | GAG GCC AAT TTT GTC TCC ACA   |
| <i>E-cad</i>   | CTG CTG CTC CTA CTG TTT CTA C | TCT TCT TCT CCA CCT CCT TCT   |
| <i>N-cad</i>   | CAG GGT GGA CGT CAT TGT AG    | AGG GTC TCC ACC ACT GAT TC    |
| <i>Gapdh</i>   | TGG ATT TGG ACG CAT TGG TC    | TTT GCA CTG GTA CGT GTT GAT   |

**Supplementary Table 5: *In vitro* mutagenesis primer sets**

| Gene                 | Forward primer (5'-3')                                    | Reverse primer (5'-3')                                       |
|----------------------|-----------------------------------------------------------|--------------------------------------------------------------|
| Nanog- mut1 Proximal | GTT TGG GAG GAC GAA GGA GAC<br>CCC GAG GAA GG             | CCT TCC TCG GGG TCT CCT<br>TCG TCC TCC CAA AC                |
| Nanog- mut 2 Distal  | AGG TCG TTT TTG CCT GGT TTG<br>GGA GGA CG                 | CGT CCT CCC AAA CCA GGC<br>AAA AAC GAC CT                    |
| Stat3- mut1 Proximal | TTT CCT ATA AAA CAT GAT TAC<br>GTC CCT CCT CCT CAC G      | CGT GAG GAG GAG GGA CGT<br>AAT CAT GTT TTA TAG GAA A         |
| Stat3- mut 2 Distal  | CTG GAA AGC GGA AAC TAT GAT<br>TAC GAA CTT CGA AAA GTC CC | GGG ACT TTT CGA AGT TCG<br>TAA TCA TAG TTT CCG CTT<br>TCC AG |

**Supplementary Table 6: ChIP-qPCR primer sets**

| Gene                          | Forward primer (5'-3')      | Reverse primer (5'-3')           |
|-------------------------------|-----------------------------|----------------------------------|
| Nanog- Proximal Binding Site  | ATG GTT TGG GAG GAC GAG TTA | AAA GTT TCC GCT TTC CAG<br>TCC   |
| Stat3 - Distal Binding Site   | GGA CTG GAA AGC GGA AAC T   | GCA GAC TTG GAG GCT CTT<br>ATA C |
| Stat3 – Proximal Binding Site | GCC AGG TCG TTT TTG AAT GG  | CGT GCA GGC GGA AAG TTT<br>GG    |

|                        |                           |                             |
|------------------------|---------------------------|-----------------------------|
| Specificity control -1 | CCC AGC AAT CCC AAA TCG G | CAG CAA TGG CAA CAG CTT CTA |
| Specificity control -2 | CTC ACG TCA GGC CAA TGA   | GAG AGC TGC AGA CTT GGA G   |

## SUPPLEMENTARY DISCUSSION

We demonstrated a synergistic interaction between alcohol consumption and HCFD, resulting in the highest observed tumor incidence in NS5A Tg mice (Fig. 2A). Additionally, a classical TLR4 activation was observed through canonical TAK-1, TRAF6 and pIKK- $\beta$  signaling in both the HCFD- as well as HCFD - fed NS5A Tg mouse models (Figs. 1). We observed from RNA microarray analysis that *Twist1* was increased 11.9-fold in NS5A Tg mice fed HCFD (Fig. 2A). Long-term treatment of mice with HCFD activated *Tlr4-Nanog* signaling (Fig. 2D) and increased leptin and endotoxin levels in the plasma (Fig. 1B). A previous RNA microarray analysis of tissues from alcohol fed NS5A Tg mice<sup>1</sup> did not exhibit *Twist1* induction. These results led us to hypothesize that the adipose tissue-derived leptin-pSTAT3 axis and the TLR4-NANOG axis are needed for activation of *Twist1* in TICs. Consequently we analyzed the *Twist1* promoter for the functional importance of NANOG and pSTAT3 binding sites (Fig. 4). Our experiments showed that relative to the TSS, both NANOG proximal and STAT3 distal sites were required for maximum response to leptin and LPS stimulation, respectively. We postulate that this finding might be due to formation of a transcription complex comprised of these two DNA binding proteins on the *Twist1* promoter allowing contiguous stacking of these two trans-acting proteins.

In support of such a functional model, Watt *et al.*, showed that *Nanog* interacts with *Stat3* to regulate its own gene expression.<sup>2</sup> Building upon their research, we further established through sequential-ChIP-qPCR analysis (Fig. 4E) that these two transcription factors indeed interacted with one other to transactivate *Twist1*. The *in vitro* data were corroborated in mice and human tissue sections, where we demonstrated by IHC and IF that TWIST1 co-localized with TLR4, P-STAT3 and NANOG. Nevertheless, future experiments are warranted to understand how these transcription factors activate *Twist1*. Potential mechanisms could be histone modifications in the *Twist1* promoter or enhancer regions.<sup>3</sup> Master regulators involved in EMT during wound healing process have a robust expression of poised enhancer marks. This is to methodically shift the cells to the native state post remodeling. An understanding of such epigenetics marks in HCC associated TICs and specifically targeting the epigenetics marks is needed in both mouse and patient derived models.

Moreover, we observed that over-expression of *Twist1* in the absence of *Tlr4* can independently drive tumor formation and metastasis (Fig. 7) which underscores the importance of various TLR4 dependent oncogenic pathways. We speculate that this phenomenon might be due to basal level expression of *Tlr4* after shRNA treatment.

## SUPPLEMENTARY MATERIALS AND METHODS

### Isolation of mouse TICs using FACS

Tumor-initiating stem-like cells (TICs) were isolated from liver tumors in HCV-NS5A transgenic mice fed *ad lib* with an ethanol-containing liquid diet high in cholesterol and saturated fat (HCFD) (as previously described).<sup>4</sup> Briefly tumors were surgically resected and mechanically



dissociated by scissors. The tissue homogenate was digested with collagenase IV (BD Biosciences) and dispase (Sigma) mixture by incubation at 37°C for 2 hours. The resulting single cell suspensions were incubated with anti-CD133, anti-CD49f and anti-CD45 antibodies and separated using FACS sorting, according to the manufacturer's protocol as previously described<sup>4</sup>. Isolated TICs were maintained in Dulbecco's modified Eagle's medium nutrient mixture F-12 (DMEM/F12) containing 10% fetal bovine serum (FBS), 1% nucleosides, 1 µM dexamethasone, epidermal growth factor (EGF), 1 µg/ml penicillin, 1 µg/ml streptomycin and 1% nonessential amino acids (NEAA). CD133<sup>+</sup> TICs and CD133<sup>-</sup> control cells were cryopreserved in 60% FBS, 20% DMEM/F12, and 20% DMSO.

### **Plasmids, production and propagation of lentivirus and retrovirus vectors**

The NS5A expression plasmid was constructed by inserting HCV-NS5A cDNA downstream of the CMV promoter into pcDNA3.1 (Invitrogen). All retroviruses were based on lentivirus (pPAX2: Addgene) or MMTV vectors (pVPack-GP: Stratagene). Lentivirus vectors were prepared by standard procedures using HEK293T cells. The packaging vector pPAX2 (Addgene), amphotropic envelope gene (VSV glycoprotein), packaging vector expressing GAG-POL: pMDV (Addgene), and shRNA expression cassette were co-transfected into HEK293T cells using BioT transfection reagent (Bioland Scientific LLC). Retroviruses expressing *Stat3C* and *Stat3D* were obtained from Prof. Daniel C. Link (Washington University of School of Medicine).<sup>5</sup> Retroviruses expressing *Stat3C* and *Stat3D* were produced using Phoenix cells/HEK293T.<sup>6</sup> 48 hours post transfection, the virus containing, cell supernatants were harvested, purified, mixed with polybrene (4 µg/ml), and used to infect cells (Huh7 / TICs). The lentivirus titers were determined using LentiX-gostick (Clontech). Human GIPZ lentiviral shRNAmir target gene set was used for human toll-like receptor 4 (TLR4) (RHS4531-NR\_024169, RHS4430-98525129, RHS4430-98843572, and RHS4430-99137800) (Open Biosystems). To increase silencing effects and to reduce off-target effects, a combination of shRNA lentiviruses were used to knock down target genes. MOI was calculated on a case by case basis depending on empirical transduction efficiency. The TWIST1-pGL3 reporter constructs were obtained from Prof. Nakamura (Tokyo Medical and Dental University).<sup>7</sup>

### **Tumor collection and analysis**

Tumor-bearing animals were sacrificed at day 30 or 35 (depending on the cell number injected) or whenever the tumor size exceeded the limit, and tumors were collected and measured for volume and weight. The tumor tissues were divided for (1) fixation with neutrally buffered 10% formalin for H&E staining and histological evaluation of the tumor; (2) fixation with 4% paraformaldehyde followed by sucrose treatment for subsequent immunostaining; and (3) snap-freezing in liquid N<sub>2</sub> for mRNA and protein analysis.

### **Endotoxin measurement**

For endotoxin measurements, blood was collected from the inferior vena cava with pyrogen-free heparin as previously described.<sup>8</sup> Extreme precautions were taken to avoid or eliminate pyrogen and endotoxin contamination of all surgical instruments and laboratory supplies. Blood samples were transferred into appropriate glass tubes made pyrogen-free by heat-treatment at 180°C for 24 hours. Pyrogen-free water was supplied by the manufacturer (Kinetic-QCL, Santa Clara, CA; Biowhittaker). Just prior to assay, plasma samples were diluted and heated to 75°C for 10 minutes to denature endotoxin-binding proteins that can mask endotoxin detection. Levels of endotoxin were measured using the Limulus amoebocyte lysate pyrogen test and a kinetic program (Kinetic test, Kinetic-QCL, Santa Clara, CA; Biowhittaker). The threshold of detection is

0.1 pg/ml.

### **Histology & immunohistochemistry**

Tissue samples were either fixed in 10% neutral buffered formalin and cryopreserved (Cryomatrix™) or with 4% paraformaldehyde (PFA) and embedded in paraffin, followed by thin-sectioning and mounted on glass slides. Samples were stained with either hematoxylin & eosin (H&E) or processed for immunostaining as appropriate. For the latter, primary antibodies against NANOG (Rabbit ab80892, Abcam), pSTAT3 (Rabbit #9134, Cell Signaling technology), TLR4 (Mouse monoclonal antibody, SC293072, Santa Cruz), TLR4 (goat sc-8694, Santa Cruz Biotechnology), or TWIST1 (Rabbit polyclonal antibody, sc-15393, Santa Cruz Biotechnology) were used along with their respective secondary antibodies. Slides were mounted for microscopy using xylene based mounting media, which includes hematoxylin for nuclei counterstaining (Vector Laboratories), as per the manufacturer's recommendations. The stained samples were then subjected to morphometric analysis. To determine the specificity of IHC, serial sections were similarly processed except primary antibodies were omitted. The area of interest was quantified using Metamorph software. The data shown represent the means  $\pm$  SD.

### **Quantitative real-time PCR (qRT-PCR)**

Total RNA was extracted by using TRIzol Reagent (Invitrogen) and purified using the RNeasy mini kit (QIAGEN) according to the manufacturer's protocol. RNA concentration and purity were determined by  $A_{260}$  and  $A_{260}/A_{280}$  ratios, respectively. The RNA samples were treated with DNase I (Invitrogen) to remove residual traces of DNA. cDNA was obtained from 1  $\mu$ g of total RNA, using SuperScript III reverse transcriptase (Invitrogen) and random primers in a final volume of 10  $\mu$ l. cDNAs were amplified by PCR using the primer pairs listed in the Supplementary Table 4. Quantitative real-time PCR was performed on an ABI 7300 HT Real-Time PCR machine using 2X SYBR Green Master Mix (Applied Biosystems). Conditions for all reactions: 1 cycle at 50°C for 2 min, followed by 1 cycle at 95°C for 10 min, followed by 40 cycles at 95°C for 15 s and 60°C for 1 min. Specificity of the PCR products were tested by thermal dissociation curves. Gene expression was determined as relative ratio to  $\beta$ -Actin or GAPDH control via the  $\Delta$ Ct method. The data shown represents the means  $\pm$  standard deviation (SD).

### **Gene array analysis of liver tumors**

For identifying anti-apoptotic or proto-oncogenic proteins, we prepared serial cytosections of the mice liver tissues, stained them with H&E, and collected hepatocytes under homeostatic conditions, dysplastic, or transformed morphology by using laser-capture microscopy as described<sup>9-11</sup>. In order to identify changes associated with HCFD, comparative analysis were performed on the cells isolated from livers of mice fed HCFD. A gene microarray analysis requires a minimum of 100-200 cells and proteomic analysis requires approximately 50,000-100,000 cells for each cell phenotype<sup>12</sup>. The cells were lysed for RNA or protein extraction for gene chip analysis and 1D gel MS/MS analysis<sup>9, 10, 12-14</sup>. The cells collected from each group of three animals were isolated for RNA or protein individually and later combined to create a representative sample pool and provide sufficient amounts of material for analysis. For gene profiling, the Affymetrix mouse gene chip (GeneChip Mouse Genome 430A 2.0) was used, and analyses were performed in the Genome Core Facility at Los Angeles Children's Hospital. Five individually extracted, mouse liver RNA specimens were pooled for each experimental group for microarray analysis. Data analysis was performed by using Partek Pro 5.1 (Partek Inc.). The

normalization of the array data and statistical analysis were performed as described previously.<sup>15-17</sup>

### **Proliferation assay**

TICs were initially seeded at  $5 \times 10^4$  cells per well in a 6-well plate. Cell number and viability were measured at day 0, 2, 3, and 4 by the Countess™ automated cell counter (Invitrogen) with trypan blue exclusion. All experiments were carried out using three biological replicates and were repeated three times. The data shown represent the means  $\pm$  SD.

### **Wound healing (migration) assay**

Cells were seeded in a 6-well plate and cultured until fully confluent. The confluent cell monolayer was slightly and quickly wounded with a linear scratch made with a sterile 200/100  $\mu$ l pipette tip. The debris were removed, and the edges of the scratch were levelled with PBS washing. The open gap was inspected and photographed microscopically (10X object, Nikon) at 1 and 24 hours<sup>18</sup>. All experiments were carried out using three biological replicates and were repeated three times. The data shown represents the mean  $\pm$  SD.

### **Soft-agar colony formation assay**

Cells ( $2.5 \times 10^3$ ) were seeded in 0.35% agarose in TIC growth medium on a layer of 0.5% agar in the TIC growth medium. Cells were incubated for 10-14 days at 37°C in a humidified atmosphere containing 5% CO<sub>2</sub> in air. The TIC growth medium (0.5 ml) was changed two or three times a week, as needed. At the end of the incubation period, colonies were stained with crystal violet (CV) followed by scanning for colony counts. The CV stain was also read at OD<sub>540</sub>. All experiments were carried out using three biological replicates and were repeated three times. The data shown represent the means  $\pm$  SD.

### **Site-directed mutagenesis**

Site-directed mutagenesis was performed as per a PCR-based mutagenesis kit (Quikchange site-directed mutagenesis kit, Stratagene, USA) with Advantage polymerase (Clontech). Consensus NANOG and STAT3 binding sites AATGG and TTCCTATAA have been previously observed *in vitro*.<sup>19, 20</sup> The TWIST1 plasmid -209/+1, containing putative NANOG binding sites (5'-TAAT(G/T)(G/T)-3' or 5'-[CG][GA][CG]C[GC]ATTAN[GC]-3') and STAT3 binding sites (5-TTC(C/T)N(A/G)GAA-3), were mutated utilizing a forward mutagenic primer and a reverse primer as previously described.<sup>20</sup> The mutated sequences were confirmed by DNA sequencing. Primers used in this analysis are listed in Supplementary Table 5. The data shown represent the means  $\pm$  SD.

### **Confocal immunofluorescent microscopy**

Immunofluorescence staining of cryosections or paraffin sections was performed using primary antibodies against NANOG (Rabbit ab80892, Abcam), P-Stat3 (Rabbit #9134, Cell Signaling technology), TLR4 (Mouse monoclonal antibody, SC293072, Santa Cruz), TLR4 (goat sc-8694, Santa Cruz Biotechnology), or TWIST1 (Rabbit polyclonal antibody, sc-15393, Santa Cruz Biotechnology) (refer Supplementary Table 3). Specimens were mounted on glass slides according to the manufacturer's recommendations using mounting media which included DAPI



for nuclei counterstaining (Vector Laboratories). To determine the specificity of IF, serial sections were similarly processed except primary antibodies were omitted. Images were captured on a Zeiss LSM510 confocal microscope using sequential acquisition imaging. The degree of staining was categorized by the extent and the intensity of staining. Image analysis of nuclear translocation was performed using Metamorph or ImageJ v3.91 software (<http://rsb.info.nih.gov/ij>). A minimum of 10 high power fields were selected for image analysis. To avoid experimental bias for the staining colocalization of TLR4/NANOG/pSTAT3 with TWIST1, nuclear (DAPI) staining was used to identify fields with near-confluent cells for the purpose of maximizing the cell numbers used for analysis. The selected fields were then evaluated for the expression of TLR4, pSTAT3, NANOG, and TWIST1. Quantitative fluorescence data were exported from ImageJ generated histograms in Microsoft Excel software for further analysis and presentation. The data shown represent the means  $\pm$  SD.

### **Tissue microarray analysis (TMA)**

The HCC TMA was constructed as previously described.<sup>21</sup> Briefly, archived liver cases were reviewed, and areas containing HCC and benign hepatic parenchyma were marked for sampling. Three cores per HCC and matched benign from the same patient, measuring 0.6 mm in diameter, were obtained from selected regions in each donor paraffin block and transferred to a recipient paraffin block.

### **Spheroid assay**

TICs (50 cells) were seeded onto Ultra low attachment 96-well plates (Corning Inc.), followed by incubation at 37°C in a humidified atmosphere containing 5% CO<sub>2</sub> for 14 days. 100  $\mu$ l/well of TIC growth medium was replaced twice a week. The number of colonies was counted under bright-field microscopy, and the proliferation was measured using counting numbers of spheroides and Luminescent Cell Viability Assay (Promega) followed by manufacturer's instructions. All experiments were carried out using 24 biological replicates and were repeated three times. The data shown represent the means  $\pm$  SD.

### **Immunoblotting**

Total cell lysates were prepared by lysing the cells in cold NP-40 buffer (150 mM NaCl, 1.0% NP-40, 10% Glycerol, and 50 mM Tris, pH 8.0) containing complete protease inhibitor mixture (Roche) for 1 h on ice, followed by centrifugation at 14,000 RPM for 15 min and collection of the clarified supernatant. Protein concentrations were determined using the DC protein assay Kit (Bio-Rad), and the supernatant was mixed with 6X Laemmli sample buffer. Proteins were separated on 10% SDS-PAGE and transferred to nitrocellulose membranes (Thermo). The membranes were blocked with 5% non-fat milk + 0.1% tween-20 for 1 h, followed by incubation with the primary antibodies: TWIST1 (Santa Cruz Biotechnology), E-CADHERIN (BD Biosciences), N-CADHERIN (Santa Cruz Biotechnology), TLR4 (Santa Cruz Biotechnology), NANOG (Abcam), pSTAT3 (Cell signaling Technology) and  $\beta$ -ACTIN (sigma) (all at 1:1,000 dilution) at 4°C overnight. Horseradish peroxidase-conjugated IgG (Santa Cruz Biotechnology; 1:2,000) was used to treat the membranes for 1 h at room temperature, and visualized with SuperSignal® West Pico Chemiluminescent substrate (Thermo). The immunoreactive bands were detected with Premium Clear Blue X-Ray films (Bioland Scientific LLC). Quantification of the bands was performed using ImageJ software. The data shown represent the means  $\pm$  SD. Antibodies used for these studies are listed in Suppl. Table 3.

### **Promoter luciferase reporter assays**

TICs obtained from NS5A transgenic mice (<10 passages in culture) were cultured in six-well plates and cotransfected using BioT (Bio land Scientific) with 1 µg Twist1 promoter-fused to *Firefly* luciferase reporter and 50 ng (SV40) *Renilla* luciferase expression vector to control for transfection efficiency. Forty-eight hours after transfection, cells were lysed in 1x passive lysis buffer, and luciferase activity was measured using the Dual-Glo Luciferase System (Promega) using a Lumat LB9501 luminometer (Berthold). At least three independent biological replicates were used for this experiment and were performed for at least total of three determination. Plasmids used in this assay are listed in Supplementary Table 5. The data shown represent the means ± SD.

### **Subcutaneous xenograft transplantation of the TICs into immunodeficient mice**

NOG mice were purchased from Taconic and housed under pathogen-free conditions in accordance with approved Institutional Animal Care and Use Committee protocols. TICs ( $10^5$ ) in 100 µl solution were mixed with 100 µl Matrigel (BD Biosciences) and were injected into the dorsal flanks of female NOG mice 8-9 weeks of age. Mice were anesthetized with ketamine (80 mg/kg) and xylazine (10 mg/kg) cocktail through I.P. during the procedure. The tumor volume was measured with a caliper and calculated according to the formula  $V=[a \times (b^2)]/ 2$ , where “V” represents tumor volume, “a” represents the largest, and “b” the smallest superficial diameter<sup>22</sup>. The data shown represents the mean ± SD.

### **Live animal imaging**

The tumor bearing mice was monitored using noninvasive imaging by whole-body GFP imaging utilizing the bioluminescence imaging system (IVIS 200 Imaging Series, Xenogen) at day 21 and 35.

### **Chromatin immunoprecipitation (ChIP) and re-ChIP analysis**

CD133+ liver TICs grown in 10-cm cell culture dishes following LPS and leptin treatment were fixed for 10 min at room temperature by addition of 1% paraformaldehyde to the growth medium. Cells were washed twice in cold PBS supplemented with complete protease inhibitor mixture and gently scraped from the plate. Cell lysis and chromatin immunoprecipitation (ChIP) were performed using the ChIP Assay Kit (Millipore). For chromatin fragmentation, cells were sonicated using a Branson Sonifier 450 on power setting 4 in 30-s bursts with 1 min cooling on ice for a total sonication time of 4 min. For immunoprecipitations, 8 µg of each antibody was used. Anti-Nanog (Abcam) and Anti Stat3 (Cell signaling technology) monoclonal antibody were used for immunoprecipitation. Preimmune IgG was used as the antibody specificity control. Immunoprecipitated DNA was quantified for *Twist1* promoters using q-PCR primers which are listed in Supplementary Table 6. The Re-ChIP or Sequential ChIP analysis was performed according to the manufacture’s protocol (Active Motif Re-ChIP IT®), whereas all the initial sample preparation where the same as explained above. The data shown represent the means ± SD.

### **Statistical analysis**

Statistical significance was estimated by un-paired, two-tailed Student’s *t* test. P values are indicated in the figures. Bars represent the mean and error bars the SD. For most of the figures,

statistical significance is represented by asterisks above each column: \*P<0.05, \*\*P<0.005, \*\*\*P<0.001 and \*\*\*\*P<0.0001. Some figures have been represented with pound sign or ampersand, details of which are given in the respective figure legends. For Figure 7 B, statistical significance was calculated using two-way ANOVA method. In this specific analysis the time point used was where all mice were still alive, before any required euthanasia.

## References

1. Machida K, Tsukamoto H, Mkrtchyan H, et al. Toll-like receptor 4 mediates synergism between alcohol and HCV in hepatic oncogenesis involving stem cell marker Nanog. *Proc Natl Acad Sci U S A* 2009;106:1548-53.
2. Torres J, Watt FM. Nanog maintains pluripotency of mouse embryonic stem cells by inhibiting NFkappaB and cooperating with Stat3. *Nat Cell Biol* 2008;10:194-201.
3. Yang MH, Hsu DS, Wang HW, et al. Bmi1 is essential in Twist1-induced epithelial-mesenchymal transition. *Nat Cell Biol* 2010;12:982-92.
4. Chen CL, Tsukamoto H, Liu JC, et al. Reciprocal regulation by TLR4 and TGF-beta in tumor-initiating stem-like cells. *J Clin Invest* 2013;123:2832-49.
5. McLemore ML, Grewal S, Liu F, et al. STAT-3 activation is required for normal G-CSF-dependent proliferation and granulocytic differentiation. *Immunity* 2001;14:193-204.
6. Saitoh S, Akashi S, Yamada T, et al. Lipid A antagonist, lipid IVa, is distinct from lipid A in interaction with Toll-like receptor 4 (TLR4)-MD-2 and ligand-induced TLR4 oligomerization. *Int Immunol* 2004;16:961-9.
7. Ohkuma M, Funato N, Higashihori N, et al. Unique CCT repeats mediate transcription of the TWIST1 gene in mesenchymal cell lines. *Biochem Biophys Res Commun* 2007;352:925-31.
8. Mathurin P, Deng QG, Keshavarzian A, et al. Exacerbation of alcoholic liver injury by enteral endotoxin in rats. *Hepatology* 2000;32:1008-17.
9. Marko-Varga G, Berglund M, Malmstrom J, et al. Targeting hepatocytes from liver tissue by laser capture microdissection and proteomics expression profiling. *Electrophoresis* 2003;24:3800-5.
10. Michel C, Desdouets C, Sacre-Salem B, et al. Liver gene expression profiles of rats treated with clofibrac acid: comparison of whole liver and laser capture microdissected liver. *Am J Pathol* 2003;163:2191-9.
11. Espina V, Milia J, Wu G, et al. Laser capture microdissection. *Methods Mol Biol* 2006;319:213-29.
12. Wulfkuhle JD, Sgroi DC, Krutzsch H, et al. Proteomics of human breast ductal carcinoma in situ. *Cancer Res* 2002;62:6740-9.
13. Wulfkuhle JD, Liotta LA, Petricoin EF. Proteomic applications for the early detection of cancer. *Nat Rev Cancer* 2003;3:267-75.
14. Espina V, Mehta AI, Winters ME, et al. Protein microarrays: molecular profiling technologies for clinical specimens. *Proteomics* 2003;3:2091-100.
15. Storey JD, Tibshirani R. Statistical significance for genomewide studies. *Proc Natl Acad Sci U S A* 2003;100:9440-5.
16. Sitkiewicz I, Musser JM. Expression microarray and mouse virulence analysis of four conserved two-component gene regulatory systems in group a streptococcus. *Infect Immun* 2006;74:1339-51.
17. Graham MR, Virtaneva K, Porcella SF, et al. Group A Streptococcus transcriptome dynamics during growth in human blood reveals bacterial adaptive and survival strategies. *Am J Pathol* 2005;166:455-65.

18. Rodriguez LG, Wu X, Guan JL. Wound-healing assay. *Methods Mol Biol* 2005;294:23-9.
19. Jauch R, Ng CK, Saikatendu KS, et al. Crystal structure and DNA binding of the homeodomain of the stem cell transcription factor Nanog. *J Mol Biol* 2008;376:758-70.
20. Cheng GZ, Zhang WZ, Sun M, et al. Twist is transcriptionally induced by activation of STAT3 and mediates STAT3 oncogenic function. *J Biol Chem* 2008;283:14665-73.
21. Huang J, Yao JL, Zhang L, et al. Differential expression of interleukin-8 and its receptors in the neuroendocrine and non-neuroendocrine compartments of prostate cancer. *Am J Pathol* 2005;166:1807-15.
22. Carlsson G, Gullberg B, Hafstrom L. Estimation of liver tumor volume using different formulas - an experimental study in rats. *J Cancer Res Clin Oncol* 1983;105:20-3.
